# Supplementary material
Source: MDPI journal article supplement (https://www.mdpi.com/2073-4441/13/5/662)
Supplement: s1 [file s1]

## Sheet: MetaData
Article Information: Using concentration-discharge relationships to identify influences on surface and subsurface water chemistry along a watershed urbanization gradient; Water
Jessica Balerna1,2 (jbalerna@usf.edu), Jacob Melone2,3, and Dr. Karen Knee2
1University of South Florida (Tampa, FL), 2American University (Washington DC), 3McDonough Braungart Design Chemistry (Charlottesville, VA)
Parameter	Sampling Name	Units	Year	N (for each site)	Nmissing (for each site)	Notes
Surface Water
Temperature	SW_Temp	degrees C	2014-2015, 2016-2017	88	0
Dissolved Oxygen	SW_DOMG; SW_DOP	mg/L ; %	2014-2015, 2016-2017	88	0
pH	SW_pH		2014-2015, 2016-2017	88	0
Specific Conductance	SW_SpC	µS/cm	2014-2015, 2016-2017	88	0
Stream Discharge	Flow_ms	m3/s	2014-2015, 2016-2017	88	0
Turbidity	Turbidity	NTU	2014-2015, 2016-2017	58	15	Turbidity meter wasn't purchased until after the first 15 samples in 2015 (2017 adjusted)
NO2- + NO3-	SW_NN	mg N L-1	2014-2015, 2016-2017	88	0
NH4+	SW_NH4	mg N L-1	2014-2015, 2016-2017	88	0
PO43-	SW_P	mg P L -1	2014-2015, 2016-2017	88	0
SO42-	SW_S	mg S L-1	2014-2015, 2016-2017	88	0
Elements (Al - Sr)	SW_Al - SW_Sr	mg x L-1	2014-2015, 2016-2017	88	0	Elements include Al, Ba, Ca, Cr, Fe, K, Mg, Mn, Ni, Sr
Subsurface water
Temperature	HZ_Temp	degrees C	2016-2017	36	0
Dissolved Oxygen	HZ_DOMG; HZ_DOP	mg/L	2016-2017	36	0
pH	HZ_pH		2016-2017	36	0
Specific Conductance	HZ_SpC	µS/cm	2016-2017	36	0
NO2- + NO3-	HZ_NN	mg N L-1	2016-2017	36	0
NH4+	HZ_NH4	mg N L-1	2016-2017	36	0
PO43-	HZ_P	µg P L -1	2016-2017	36	0
SO42-	HZ_S	mg S L-1	2016-2017	36	0
Elements (Al - Sr)	HZ_Al - HZ_Sr	mg x L-1	2016-2017	36	0	Elements include Al, Ba, Ca, Cr, Fe, K, Mg, Mn, Ni, Sr
Weather Station
Precipitation	Daily_Rainfall	mm	2014-2015, 2016-2017	75	13	Missing data are from before the weather station was installed and were supplemented with US Climate Data for station (US1VAFX0050) in Lorton VA
12-hour Antecedant	Ant_12	mm	2014-2015, 2016-2017	75	13	Calculated as the sum of rainfall 12 hours prior to the start of sampling time (9:00am); supplemented data is daily, not hourly, preventing the calculation of the antecedant rainfall conditions for the first 13 sampling dates
24-hour Antecedant	Ant_24	mm	2014-2015, 2016-2017	75	13	Calculated as the sum of rainfall 24 hours prior to the start of sampling time (9:00am); supplemented data is daily, not hourly, preventing the calculation of the antecedant rainfall conditions for the first 13 sampling dates
48-hour Antecedant	Ant_48	mm	2014-2015, 2016-2017	75	13	Calculated as the sum of rainfall 48 hours prior to the start of sampling time (9:00am); supplemented data is daily, not hourly, preventing the calculation of the antecedant rainfall conditions for the first 13 sampling dates
Survey Data	Sample Name	Water Samples	Year	N		Notes
Giles Run	Same variables as above	Ground & Surface	Fall 2016; Spring 2017	7	0	10/29/16, 3/4/2017; 4 sites outside park, 3 sites within park; site #5 is the weekly sampling site
South Branch	Same variables as above	Ground & Surface	Fall 2016; Spring 2017	5 (Fall); 4 (Spring)	0	10/29/16, 3/4/2017; 4 sites within park; site #1 is the weekly sampling site; 1 site not sampled in Spring due to no flow
Thompson Creek	Same variables as above	Ground & Surface	Fall 2016; Spring 2017	6	0	10/26/16, 3/8/2017; 6 sites within park; site #2 is the weekly sampling site

## Sheet: Appendix 1-Spatial Data
Appendix 1: Raw spatial data from 4–6 additional sampling sites within each stream system. The data are sorted first by location, then season collected, and finally from upstream to downstream with the lowest numbered sites being the most upstream.
Date	Season	Location	Upstream to Downstream	Composite	Latitude	Longitude	Flow_ms	SW_Rn	SW_Temp	SW_DOMG	SW_DOP	SW_SpC	SW_Cond	SW_pH	SW_N+N	SW_NH4	SW_TIN	SW_PO4	SW_SO4	SW_Al	SW_Ba	SW_Ca	SW_Cr	SW_Fe	SW_K	SW_Mg	SW_Mn	SW_Ni	SW_Sr	GW_Rn	HZ_Temp	HZ_DOMG	HZ_DOP	HZ_SpC	HZ_pH	HZ_NN	HZ_NH4	HZ_DIN	HZ_P	HZ_S	HZ_Al	HZ_Ba	HZ_Ca	HZ_Cr	HZ_Fe	HZ_K	HZ_Mg	HZ_Mn	HZ_Ni
2016-10-29	Fall	Giles Run	1	GR1	38.7064	-77.231	0.00254977	435.583	11.5	9.1	83	257.8	191.6	6.53	1.152	0	1.152	15.463	13.491	0.0169649	0.119616	18.7293	0.00861244	0.291252	4.68313	6.32691	0.0274431	0.0195288	0.0917243	1507.15	13.7	4.7	45	143.5	6.62	1.055	0.0489	1.1039	14.812	7.1
2016-10-29	Fall	Giles Run	2	GR2	38.7043	-77.233	0.0127701	1005.86	10.3	10.1	90	264	190	6.64	0.819	0	0.819	15.626	17.419	0.0184816	0.0811618	24.5612	0.00306841	0.112197	5.78417	5.75458	0.0684911	0.0119115	0.117057	6494.55	13.5	4.5	43	508.5	6.47	0	15.8142	15.8142	17.256	11.063	0.00905755	0.113372	20.119	0.00415925	0.0608999	4.54091	5.62079	0.0280472	0.0113887
2016-10-29	Fall	Giles Run	3	GR3	38.701	-77.2308	0.0148205	929.393	10.8	9.2	82	244	177.6	6.62	0.698	0	0.698	15.789	7.599	0.0170852	0.113337	21.9944	0.00247563	0.164541	5.46119	6.13323	0.0453417	0.00996978	0.104129	3647.12	13.4	2.8	27	460.5	6.37	0	1.2135	1.2135	16.767	6.278	0.032092	0.316886	31.7927	0.00396002	58.4316	5.51824	9.54225	5.14307	0.0048542
2016-10-29	Fall	Giles Run	4	GR4	38.678	-77.2248	0.0385795	391.319	12.4	9.3	86	391.8	297.2	6.45	0.426	0.0151	0.4411	15.952	20.561	0.00642799	0.141885	34.1859	0.00179349	0.471258	8.0728	10.6968	0.763275	0.0117891	0.185677	4101.65	15.1	3.2	32	1358	6.28	0	1.3424	1.3424	18.885	2.35	0.0326272	0.452301	91.5639	0.00255408	48.0726	8.9356	18.98	6.2622	0.0153469
2016-10-29	Fall	Giles Run	5	GR5	38.6724	-77.221	0.0245688	393.436	12.8	9.4	89	391.5	300.1	6.51	0.401	0	0.401	14.486	13.85	0.0118725	0.133851	34.618	0.00283015	0.299466	8.32147	10.8956	0.40103	0.0160837	0.17869	1769.13	15.3	1.6	16	397	6.6	0.073	0	0.073	14.649	14.087	0.0180782	0.149793	34.7089	0.00263296	1.61556	7.711	10.6655	0.124478	0.0100208
2016-10-29	Fall	Giles Run	6	GR6	38.6721	-77.2208	0.0298583	340.404	12.9	9.5	99	384.5	295.5	6.52	0.381	0	0.381	15.463	14.053	0.00676903	0.122989	32.9862	0.00415789	0.425949	7.62023	10.6769	0.37638	0.00875763	0.172046	686.242	14.7	3.8	38	379.4	6.59	0	1.2568	1.2568	17.419	8.47	0.015228	0.183263	24.5639	0.00310433	29.9405	5.48455	7.1919	2.25365	0.0180416
2017-03-04	Spring	Giles Run	1	GR1	38.7064	-77.231	0.00231869	678.159	6.8	11.2	90	344.5	224.8	6.3	1.384	0.283	1.667	22.953	2.583	0.0221524	0.146788	18.9626	0.00328274	0.4555	4.50487	7.02542	0.0814365	0.0164837	0.108251	326.251	8.2	2.2	19	127.4	6	0	0.261	0.261	23.678	17.572	0.0775196	0.13271	12.1844	0.00599458	7.1781	3.15888	6.15713	0.389496	0.0297886
2017-03-04	Spring	Giles Run	2	GR2	38.7043	-77.233	0.0243821	1196.56	4.4	10.6	14	285	172.7	6.25	0.523	0.136	0.659	20.597	6.711	0.0201335	0.0967353	19.7941	0.00179349	0.2311	4.13207	4.88218	0.085706	0.00669454	0.109932	206.207	9.7	4.4	38	450	5.7	0	0.487	0.487	24.221	16.726	0.0354621	0.16278	11.3263	0.00544808	22.1416	2.17617	4.11523	1.41376	0.0185047
2017-03-04	Spring	Giles Run	3	GR3	38.701	-77.2308	0.0355102	923.214	6.6	12.9	103	293	189.9	6	0.571	0.135	0.706	23.496	3.158	0.0162146	0.12713	20.2642	0.00227614	0.267624	4.45662	5.91606	0.0845885	0.0207994	0.114377	400.033	8.2	4.3	36	320.5	6	0	0.247	0.247	22.953	11.922	0.0395546	0.214787	16.4534	0.00452598	10.9264	4.77655	6.5103	0.841952	0.0266939
2017-03-04	Spring	Giles Run	4	GR4	38.678	-77.2248	0.0461771	435.17	7.1	14.9	121	494.8	325.3	6	0.297	0.284	0.581	37.268	1.957	0.019287	0.176516	30.9866	0.00325082	1.08406	6.32684	9.51946	2.94547	0.0232414	0.162981	164.453	9.2	1.4	12	633.2	6.2	0.012	1.709	1.721	20.597	0	0.0207425	0.204449	43.9599	0.00360952	28.0897	9.07106	11.763	4.86533	0.0227783
2017-03-04	Spring	Giles Run	5	GR5	38.6724	-77.221	0.0333841	381.425	7.6	14.1	116	485.2	324.5	6.2	0.358	0.285	0.643	21.141	5.899	0.0135898	0.151179	28.5661	0.00337664	0.749703	6.62023	9.49269	2.34675	0.0187573	0.161139	124.212	7	6.3	51	487	6	0.43	0.194	0.624	43.973	0	0.0130935	0.095786	28.426	0.00300292	0.102376	5.38845	7.82062	0.0114752	0.0134733
2017-03-04	Spring	Giles Run	6	GR6	38.6721	-77.2208	0.0413534	314.093	7.8	13.7	112	468.3	314	6	0.358	0.2695	0.6275	24.04	6.677	0.0163517	0.143969	29.5853	0.00347054	0.858937	6.85817	9.98842	2.36091	0.0237046	0.170952	326.151	7.6	2.7	22	593.2	6	0	2.95	2.95	28.389	0	0.0324627	0.266213	38.5591	0.00452035	23.208	13.5629	12.0014	3.10038	0.0186521
2016-10-29	Fall	South Branch	1	SB1	38.6825	-77.2159	0.000363725	2130.3	13.6	3.2	31	1524	1194	6.96	0.588	0	0.588	19.048	10.563	0.0547278	0.458939	184.156	0.00220102	0.137347	55.4774	109.574	0.673187	0.0334306	2.93239	539.171	15.9	3.2	32	836	7.16	0	0.4274	0.4274	23.121	21.632	0.0325267	0.412995	150.84	0.00269117	0.562317	36.7278	71.8536	5.498	0.0298096
2016-10-29	Fall	South Branch	2	SB2	38.6838	-77.2121	0	3359.36	12.8	1.8	17	1012	775	6.62	0.279	0.6647	0.9437	24.914	23.418	0.0985149	0.164879	91.4713	0.00116436	12.3227	24.1974	31.4829	2.96525	0.0281676	0.401879	2103.64	13.8	1.8	17.1	994	6.36	0	0.7841	0.7841	17.093	57.553
2016-11-02	Fall	South Branch	3	SB3	38.6762	-77.2156	0.0039194	1016.25	13.6	8.1	78	385.7	301.4	6.19	1.124	0	1.124	26.706	41.485	0.0214368	0.127026	35.7555	0.00180288	0.0554414	10.2302	20.229	0.012939	0.0162521	0.290424	154.112	14.9	4.9	48	388.5	6.45	1.077	0	1.077	38.111	20.454	0.0131666	0.129036	35.6621	0.00300292	0.0282282	10.5536	20.2622	0.00280525	0.0267992
2016-11-02	Fall	South Branch	4	SB4	38.6758	-77.2155	0	430.57	13.2	1.5	15	216.3	167.4	6.34	0	0	0	19.863	18.954	0.0429467	0.109111	14.298	0.00138596	0.302934	5.54715	6.80553	0.157698	0.0235572	0.0777468	2826.62	14.8	2.3	23	214.9	6.03	0	0	0	25.728	19.526	0.0220367	0.119674	14.5115	0.00429123	0.0400283	5.5372	6.66497	0.0124283	0.0176626
2017-03-08	Spring	South Branch	2	SB2	38.6838	-77.2121	0	1516.83	11.1	4.4	41	1414	1060	6.25	0	0.58	0.58	27.03	0	0.0339091	0.19037	89.0117	0.00329777	3.04505	25.0982	28.0997	2.54642	0.0201468	0.408492	88.5724	15.1	1.2	12	1545	6	0	0.427	0.427	23.406	0	0.0497096	0.300155	154.494	0.00276629	53.5852	18.8285	42.0957	5.76617	0.0342516
2017-03-04	Spring	South Branch	3	SB3	38.6762	-77.2156	0.0023552	953.19	7	10.7	87	364.7	239.1	6	1.707	0.129	1.836	35.456	15.474	0.0148383	0.116279	28.8928	0.003679	0.0406083	8.22531	17.2554	0.0157062	0.012947	0.213839	916.199	6.9	11	88	298.5	6	1.368	0.144	1.512	41.255	19.467	0.0207913	0.102427	22.8864	0.0024583	0.0445779	7.36449	13.5656	0.0053357	0.0181679
2017-03-04	Spring	South Branch	4	SB4	38.6758	-77.2155	0	4557.68	6.5	4.3	34	250.4	161.8	6	0	0.153	0.153	19.147	15.982	0.0263058	0.119721	15.3925	0.0026461	0.0797907	4.89539	7.80209	0.0285668	0.0189889	0.0993643	876.118	7.1	3.1	27	242.4	6	0	0.345	0.345	20.959	14.967	0.0361167	0.0993211	11.9216	0.00269493	10.8389	4.26189	5.62485	0.188561	0.0152416
2016-10-26	Fall	Thompson	1	TC1	38.6737	-77.2028	0.000804829	538.33	10.9	9	80	61.3	44.9	5.85	0.164	0	0.164	21.6	0	0.0678396	0.0679685	2.45643	0.0032527	0.604605	3.29397	2.86195	0.158395	0.014968	0.0236278	738.023	12.4	2.4	22	68.3	5.9	0.002	0.2832	0.2852	49.7	0	0.141392	0.0835758	2.69624	0.00370529	0.873963	2.66894	3.69943	0.39418	0.0205468
2016-10-26	Fall	Thompson	2	TC2	38.6691	-77.1991	0.00115176	1440.43	10.9	5.1	55	104.8	76.7	5.76	0.508	0	0.508	13.3	0	0.0231085	0.0815568	5.61334	0.00310058	0.235874	4.05715	4.95334	0.134493	0.0139154	0.0437464	3811.08	13.1	2.1	20	92.1	5.75	0	0.0612	0.0612	5.4	3.226	0.0434856	0.0938336	3.83619	0.00231557	3.1571	3.3657	3.04149	0.94721	0.017389
2016-10-26	Fall	Thompson	3	TC3	38.6694	-77.1998	0.00135571	92.1493	11.2	9	81	120	88.5	5.95	2.393	0	2.393	23.1	0.79	0.0244848	0.0975078	4.91301	0.00353815	0.0961524	4.27877	6.0478	0.0159618	0.0190521	0.0401177	997.791	13.6	3.9	37	111.6	6.09	1.26	0.0617	1.3217	19.6	3.463	0.0315645	0.0922845	4.4264	0.00370154	1.25402	4.55819	5.10293	0.27346	0.00294728
2016-10-26	Fall	Thompson	4	TC4	38.6693	-77.1977	0.000127259	5437.36	12	4.6	45	158.5	119.4	5.83	0	0	0	12	2.38	0.0461713	0.111251	7.26226	0.00094839	0.0942431	5.67772	4.27056	0.161343	0.0158943	0.0523987	4388.34	14.9	4.4	43	369.3	5.47	0	0.046	0.046	7.8	0.587	0.0925041	0.11942	6.42463	0.00240572	0.388017	5.1054	3.94197	0.377274	0.0079366
2016-10-26	Fall	Thompson	5	TC5	38.6616	-77.1951	0.00452118	1605.49	9.9	7.8	68	97	69.1	7.52	0.019	0.02625	0.04525	18.4	0.621	0.0148231	0.0770702	5.59652	0.00360764	3.5924	3.80887	4.3011	0.122008	0.0152416	0.0527109	3449.22	14.1	3.7	36	240.3	6.75	0	1.077	1.077	64.8	0	0.0551632	0.382424	12.2559	0.00652229	135.408	2.80552	6.22241	1.7884	0.0148206
2017-03-08	Spring	Thompson	1	TC1	38.6737	-77.2028	0.0036	539.932	10.2	7.1	63	58.4	41.8	6	0.022	0.135	0.157	26.396	0	0.101036	0.0641308	2.33591	0.00234374	0.25203	3.21151	2.54982	0.0115975	0.0189257	0.0209577	35.5775	14.2	6	58	59.6	6.3	0.076	0.135	0.211	24.221	0.824	0.117312	0.0659341	2.27666	0.00466683	0.404337	3.30593	2.6767	0.0294549	0.0164416
2017-03-08	Spring	Thompson	2	TC2	38.6691	-77.1991	0.00373333	2657.68	11.3	10.1	92	99.3	73.1	6.5	0.251	0.131	0.382	16.067	2.752	0.042024	0.0936869	5.03753	0.00229867	0.360109	3.83059	4.01766	0.0786409	0.0171574	0.0477914	157.454	14.1	4.5	47	90.6	6	0.076	0.147	0.223	18.332	1.771	0.12247	0.160058	6.48565	0.00385553	0.183048	3.78527	4.57779	0.217131	0.0147996
2017-03-08	Spring	Thompson	3	TC3	38.6694	-77.1998	0.001125	1853.43	10.5	7.1	64	95.9	69.1	6	0	0.13	0.13	27.121	0	0.101228	0.0709796	4.88634	0.00243764	0.0771322	3.50948	3.08891	0.0245286	0.0149469	0.0361812	35.4943	12.8	4.1	38	102.1	6.4	0.007	0.229	0.236	41.799	0	0.0602088	0.0786233	5.56411	0.00437011	0.257135	3.87948	3.13026	0.102818	0.0160837
2017-03-08	Spring	Thompson	4	TC4	38.6693	-77.1977	0.00495833	2193.26	10.4	9.2	82	167.4	120.8	6.2	0	0.2255	0.2255	27.936	2.008	0.0390217	0.104233	6.31511	0.00359261	0.0320891	4.52595	4.18296	0.0212471	0.0162521	0.0501515	101.625	12.6	6.3	59	166.4	6.5	0.001	0.134	0.135	20.778	2.194	0.0703121	0.0970057	6.60459	0.00473068	0.0750658	5.15927	4.01271	0.017764	0.0126733
2017-03-08	Spring	Thompson	5	TC5	38.6616	-77.1951	0.0036451	1489.84	10.5	10.6	95	106.4	77	6.5	0	0.163	0.163	41.799	0	0.0159436	0.0799505	6.57716	0.00546686	1.36141	3.93332	4.21542	0.350916	0.0131575	0.0524629	129.668	12.6	2	18	144	6.2	0	0.448	0.448	20.235	0	0.0274781	0.110855	7.17084	0.00478514	19.6935	4.80644	4.5577	0.61164	0.0105471
[truncated: 1 more columns]

## Sheet: Appendix 2-Weekly Sampling Data
Site	Sampling	Date	Season	Flow_ms	SW_Temp	SW_DOP	SW_DOMG	SW_SpC	SW_pH	SW_NN	SW_NH4	SW_TIN	SW_P	SW_S	Turbidity	SW_Al	SW_Ba	SW_Ca	SW_Cr	SW_Fe	SW_K	SW_Mg	SW_Mn	SW_Ni	SW_Sr	HZ_Temp	HZ_DOP	HZ_DOMG	HZ_SpC	HZ_pH	HZ_NN	HZ_NH4	HZ_DIN	HZ_P	HZ_S	HZ_Table_Distance	HZ_Al	HZ_Ba	HZ_Ca	HZ_Cr	HZ_Fe	HZ_K	HZ_Mg	HZ_Mn	HZ_Ni	HZ_Sr	Flow_Ms	Norm_Flow_MGL	Runoff_Ratio
Giles Run	SW	2014-06-20	Summer	0.0703789	23.8	67	5.6	300.5	6.86	0.259944	0.128167	0.388111	16.1385	7.30611		0.0195471	0.0678322	21.1242	0.001678	0.140153	4.71868	4.77845	0.299476	0.0116708	0.111399																						0.0703789	0.00563031
Giles Run	SW	2014-06-26	Summer	0.0419763	24.2	58	4.8	280	7.15	0.317333	0.128167	0.4455	13.3123	10.5526		0.0195302	0.0671044	21.8076	0.00168145	0.114881	5.08277	5.10178	0.313329	0.0108162	0.113804																						0.0419763	0.00335811	0.0165261
Giles Run	SW	2014-07-01	Summer	0.0341772	23.9	52	4.3	354.2	7.13	0.201	0.1245	0.3255	18.834	3.30775		0.0230371	0.0736829	21.7844	0.00203962	0.0460401	3.25355	3.06052	0.347399	0.00828948	0.102508																						0.0341772	0.00273417
Giles Run	SW	2014-07-10	Summer	0.0758981	23.2	49	4.1	276.5	7.08	0.2615	0.149	0.4105	13.443	8.058		0.0160741	0.0627093	19.7807	0.00131293	0.259538	5.81972	6.17305	0.237699	0.0159068	0.117885																						0.0758981	0.00607185	0.00853747
Giles Run	SW	2014-07-17	Summer	0.277301	22.1	55	4.8	275.5	6.95	0.4895	0.111	0.6005	7.66	20.292		0.0194793	0.0649209	23.8576	0.00169179	0.0390658	6.17503	6.07177	0.354889	0.00825214	0.121019																						0.277301	0.0221841
Giles Run	SW	2014-07-24	Summer	0.0370921	23.5	39	3.3	466.1	6.99	0.514	0.111	0.625	11.802	50.928		0.0227001	0.101847	44.4247	0.00332642	0.0340968	6.15983	10.1261	0.460435	0.0265674	0.211521																						0.0370921	0.00296736	0.0208617
Giles Run	SW	2014-08-01	Summer	0.0234193	21.5	49	4.3	422.8	7.24	0.5	0.11	0.61	9.73	35.61		0.0210897	0.0833838	34.1411	0.0025091	0.0365813	6.16743	8.09894	0.407662	0.0174098	0.16627																						0.0234193	0.00187355
Giles Run	SW	2014-08-07	Summer	0.0257007	22.3	44	3.8	394.6	7.02	1.428	0.136	1.564	15.787	8.3965		0.0166813	0.083873	31.8761	0.00328723	0.0330287	7.30596	9.56049	0.246788	0.0143199	0.155115																						0.0257007	0.00205606
Giles Run	SW	2014-08-15	Summer	0.0620991	19.8	42	3.8	357.7	6.79	0.5975	0.1765	0.774	15.318	48.325		0.0392824	0.099734	39.3902	0.00323661	0.0557215	6.86584	8.80147	0.576926	0.0189314	0.179087																						0.0620991	0.00496793
Giles Run	SW	2014-09-05	Summer	0.0440403	24	38	3.2	327.6	6.97	0.5015	0.1215	0.623	21.647	12.014		0.0216648	0.0717928	28.4585	0.00346686	0.0403015	4.98823	6.07978	0.238868	0.0195288	0.124124																						0.0440403	0.00352323
Giles Run	SW	2014-09-12	Summer	0.0614482	21.3	48	4.3	310.4	7.56	0.571	0.108	0.679	17.897	17.012		0.014247	0.0799248	28.3413	0.00742852	0.0522448	6.44415	7.17798	0.350815	0.011314	0.140076																						0.0614482	0.00491585	0.0142307
Giles Run	SW	2014-09-19	Summer	0.0869461	19	43	4	376.7	7.46	0.6025	0.207	0.8095	16.49	11.728		0.0202658	0.0787996	28.2355	0.00218822	0.0687173	6.06112	7.49181	0.423414	0.0135731	0.133793																						0.0869461	0.00695569
Giles Run	SW	2014-10-03	Fall	0.0323533	18.1	43	4.1	389.4	7.76	0.6	0.1425	0.7425	13.677	9.802		0.0177112	0.0778406	28.8428	0.00168036	0.050297	6.16878	8.97539	0.336473	0.0214705	0.159432																						0.0323533	0.00258826	0.0323533
Giles Run	SW	2014-10-10	Fall	0.0246513	15.9	46	4.6	242.7	7.53	0.642	0.217	0.859	9.692	7.043		0.0097584	0.098244	24.6264	0.00180283	0.09529	6.81358	8.12499	0.269558	0.0115567	0.139645																						0.0246513	0.00197211
Giles Run	SW	2014-10-17	Fall	0.0799624	15.9	80	7.9	281.8	7.44	0.48	0.049	0.529	12.036	20.721		0.020124	0.12513	24.0397	0.00255728	0.303332	5.37956	6.65834	0.30053	0.0148613	0.123285																						0.0799624	0.00639699	0.057116
Giles Run	SW	2014-10-24	Fall	0.0583899	13.8	51	5.3	288.3	7.53	0.334	0.062	0.396	11.884	7.6025	4.34	0.0124521	0.348655	22.1815	0.000888352	0.348964	3.56579	3.64973	0.42274	0.0103245	0.101713																						0.0583899	0.00467119	0.0324388
Giles Run	SW	2014-11-07	Fall	0.0669903	12.4	59	16.3	207.2	7.48	0.4815	0.0505	0.532	18.669	8.813	4.1	0.0166251	0.1142	21.8254	0.00433398	0.285105	6.47607	6.65445	0.296008	0.0220493	0.128769																						0.0669903	0.00535922
Giles Run	SW	2014-11-14	Fall	0.0696638	8	69	8.3	363.4	7.7	0.41	0.06	0.47	15.28	8.21	2.77	0.0145386	0.231428	22.0034	0.00261117	0.317035	5.02093	5.15209	0.359374	0.0161869	0.115241																						0.0696638	0.0055731
Giles Run	SW	2014-11-21	Fall	0.0438425	4.3	73	9.4	317.6	7.47	0.504	0.074	0.578	12.368	10.843	1.86	0.00592512	0.000384033	14.6149	0.00192204	0.00590097	1.04995	0.00287028	0.00110716	0.0107913	0.00802918																						0.0438425	0.0035074
Giles Run	SW	2014-12-12	Fall	0.0733409	5.8	81	10.2	304.2	7.25	0.627	0.158	0.785	15.034	18.704	3.86	0.0343096	0.134651	26.8411	0.00346849	0.503415	5.68883	7.39767	0.659513	0.0255219	0.129699																						0.0733409	0.00586727
Giles Run	SW	2014-12-19	Fall	0.05934	5.2	69	8.9	253.2	7.31	0.971	0.532	1.503	11.649	14.435	3.77	0.0150442	0.272991	27.4514	0.00268139	0.555016	5.56783	7.44308	0.791119	0.0182219	0.132621																						0.05934	0.0047472
Giles Run	SW	2015-01-02	Winter	0.0732864	3.5	88	11.8	314.7	7.6	0.769	0.58	1.349	8.6055	14.019	4.45	0.00957885	0.129523	25.1324	0.00133954	0.522327	3.51949	8.31056	1.11406	0.0317908	0.13508																						0.0732864	0.00586291
Giles Run	SW	2015-01-14	Winter	0.160973	1.7	108	15.2	484.9	7.38	0.7645	0.506	1.2705	11.762	28.9675	8.32	0.0223572	0.345526	21.7195	0.00155725	0.57987	1.94049	4.30759	0.502314	0.0247562	0.10048																						0.160973	0.0128779
Giles Run	SW	2015-01-21	Winter	0.120922	3.2	102	13.8	444.4	6.88	0.8205	0.494	1.3145	11.4235	8.813	4.67	0.0131916	0.145419	24.7866	0.00097592	0.724017	2.23824	5.38937	0.937969	0.0335765	0.115138																						0.120922	0.00967376	0.151152
Giles Run	SW	2015-01-28	Winter	0.167131	2.3	110	15.2	1073	6.91	0.673	0.084	0.757	14.3545	17.507	7.39	0.0259118	0.40925	33.6064	0.00105494	0.676058	6.79107	9.44794	0.856532	0.0273807	0.240307																						0.167131	0.0133705
Giles Run	SW	2015-02-04	Winter	0.0974344	2.5	108	14.9	530.1	7.08	0.744	0.14	0.884	4.2065	13.654	5.5	0.0124266	0.157865	25.0073	0.00102414	0.644212	4.19672	8.27997	1.04328	0.0345235	0.165343																						0.0974344	0.00779475
Giles Run	SW	2015-02-11	Winter	0.106833	3.8	111	14.6	343.6	7.03	0.71	0.11	0.82	9.28	15.58	3.66	0.0171766	0.237511	27.8001	0.00101834	0.681429	4.40868	7.70576	0.945927	0.0318269	0.173596																						0.106833	0.00854661
Giles Run	SW	2015-02-18	Winter	0.102134	0.2	114	16.4	1780	7.11	0.3565	0.148	0.5045	6.352	17.728	2.52	0.0116613	0.382143	31.1202	0.000776512	0.467083	6.24826	10.3688	1.22738	0.0247833	0.285456																						0.102134	0.00817068	0.0464243
Giles Run	SW	2015-02-25	Winter	0.135152	0.5	113	16.2	1309	7.41	0.825	0.201	1.026	7.306	15.763	4.95	0.0168009	0.430475	34.6091	0.00300291	0.690559	6.69756	10.3732	1.24337	0.0293558	0.287351																						0.135152	0.0108122
Giles Run	SW	2015-03-04	Winter	0.308033	3.5	110	14.5	1160	7.27	0.523	0.243	0.766	13.5495	23.386	11.9	0.015689	0.153072	19.2097	0.0010076	0.454392	1.18455	2.60857	0.731252	0.026082	0.0973619																						0.308033	0.0246427	0.0350038
Giles Run	SW	2015-03-25	Spring	0.10914	5.5	106	13.5	528.7	7.4	0.393	0.141	0.534	12.1725	21.372	2.67	0.0116596	0.140079	24.7593	0.00141874	0.618839	3.79947	8.29057	0.970258	0.020752	0.168779																						0.10914	0.00873119
Giles Run	SW	2015-04-01	Spring	0.10968	9.5	109	12.5	490.8	7.77	0.092	0.237	0.329	26.058	19.301	2.64	0.0646922	0.126007	22.3193	0.00223231	0.523893	3.06541	4.29288	0.723694	0.0190434	0.0950161																						0.10968	0.00877437
Giles Run	SW	2015-04-08	Spring	0.0894461	12.4	96	10.3	490.3	7.83	0.633	0.146	0.779	43.9605	17.623	3.73	0.0167134	0.116316	23.6865	0.00216046	0.367473	3.76949	5.87211	0.72535	0.0121728	0.130236																						0.0894461	0.00715569	0.0638901
Giles Run	SW	2015-04-15	Spring	0.451086	13	69	7.3	390.9	7.53	0.182	0.142	0.324	80.9125	11.804	15	0.0820957	0.0838393	18.6289	0.00328233	0.540329	3.03907	2.74367	0.310449	0.0181099	0.0930141																						0.451086	0.0360869	1.12771
Giles Run	SW	2015-04-22	Spring	0.274687	15	67	6.7	322.7	8.15	0.3615	0.155	0.5165	14.099	22.6865	6.05	0.0354919	0.0895952	20.7527	0.00264056	0.377877	4.28028	5.61028	0.42611	0.0195848	0.111619																						0.274687	0.021975
Giles Run	SW	2015-04-29	Spring	0.10884	14	92	9.4	414.8	7.21	0.592	0.1605	0.7525	18.9505	19.329	3.53	0.0151258	0.108519	23.9268	0.00431275	0.126371	4.94494	7.51653	0.698937	0.0158882	0.139494																						0.10884	0.00870719
Giles Run	SW	2015-05-06	Spring	0.0836057	19.3	84	7.8	425.4	7.26	0.6785	0.162	0.8405	14.5495	19.218	3.74	0.0153492	0.104413	23.8336	0.00240867	0.263392	5.60502	7.01736	0.498598	0.0117621	0.127895																						0.0836057	0.00668846	0.209014
Giles Run	SW	2015-05-13	Spring	0.0412625	18.6	83	7.8	456.5	7.13	0.6845	0.145	0.8295	15.761	19.2175	4.25	0.0185137	0.102958	25.8907	0.00478142	0.34145	6.36944	8.37075	0.469799	0.00937234	0.154258																						0.0412625	0.003301
Giles Run	SW	2015-05-19	Spring	0.137982	21.5	92	8.1	285.8	7.31	0.303	0.136	0.439	19.275	13.986	8.09	0.0183906	0.0739879	15.1788	0.00511292	0.309469	4.22248	3.68491	0.281509	0.0145999	0.0793023																						0.137982	0.0110385
Giles Run	SW	2015-05-26	Spring	0.0367479	19.6	82	7.5	460.9	7.26	0.3785	0.22505	0.60355	16.216	9.397	3.55	0.0131102	0.121132	29.8741	0.00176037	0.312296	5.62334	8.64733	0.689486	0.0161869	0.158614																						0.0367479	0.00293983
Giles Run	SW	2015-06-16	Spring	0.00308789	24.5	73	6	415.4	7.26	0.221	0.1375	0.3585	10.86	15.301	8.37	0.0232565	0.0662452	19.7559	0.00621683	0.211121	5.4297	3.84692	0.417568	0.0156828	0.0916242																						0.00308789	0.000247031
Giles Run	SW	2015-06-24	Summer	0.020006	23.3	87	7.6	246.2	7.4	0.2735	0.236	0.5095	18.476	13.4965	18.4	0.0389507	0.0581595	17.4056	0.0107664	0.334832	6.48526	4.00161	0.322705	0.0235055	0.0974916																						0.020006	0.00160048
Giles Run	SW	2015-06-30	Summer	0.0318725	20.5	91	18.2	291.9	7.48	0.3	0.19	0.49	14.67	23.946	15.5	0.0372012	0.0629069	19.4345	0.00479939	0.369803	5.12758	3.13085	0.431087	0.0386469	0.0811272																						0.0318725	0.0025498
Giles Run	SW	2015-07-09	Summer	0.0209793	24.3	95	8	237.7	7.11	0.29	0.035	0.325	16.57	26.38	16.95	0.0239252	0.0559241	19.7885	0.00406454	0.32159	6.62183	4.04064	0.214119	0.0295173	0.0906155																						0.0209793	0.00167834
Giles Run	SW	2016-05-18	Summer	0.118	14.9	73	6.4	367.1	6.81	0.514	0.506	1.02	24.1265	18.0285	15.8	0.0327206	0.0830886	23.321	0.00430132	0.71818	5.97859	4.95799	0.514036	0.0148613	0.111203																						0.118	0.00944	0.59
Giles Run	SW	2016-05-23	Summer	0.482	16.1	77	6.7	293.3	6.86	0.376	0.509	0.885	24.13	34.633	19.6	0.0701198	0.0496132	17.5447	0.00320068	0.574703	5.83246	3.81861	0.192802	0.0431837	0.0880129																						0.482	0.03856	1.205
Giles Run	SW	2016-06-02	Summer	0.0821	21.2	69	6.1	423.3	7.02	0.662	0.542	1.204	17.4995	24.253	8.25	0.0222453	0.0823062	24.4238	0.00277447	0.248438	6.80239	6.06913	0.502024	0.0218812	0.125602																						0.0821	0.006568	0.4105
Giles Run	SW	2016-06-06	Summer	0.224	23	85	7.3	270.2	6.96	0.3995	0.527	0.9265	20.81	31.192	13.8	0.0514082	0.0505691	14.9151	0.00613191	0.806752	5.06766	4.22423	0.196409	0.0140772	0.077643																						0.224	0.01792	1.12
Giles Run	SW	2016-06-13	Summer	0.0328	21.8	83	7.3	490.9	7.66	0.53	0.53	1.06	19.15	19.245	11.9	0.0202123	0.0831024	24.6638	0.00169342	0.377322	6.96519	6.5069	0.519736	0.0126769	0.131071																						0.0328	0.002624
Giles Run	SW	2016-06-27	Summer	0.0442	24.6	79	5.6	439.7	7.72	0.591	0.45	1.041	12.67	0.5	26	0.0155551	0.115809	22.6573	0.00535787	0.417393	3.9468	4.2132	0.42904	0.0160002	0.113585																						0.0442	0.003536	0.00235106
Giles Run	SW	2016-07-05	Summer	0.287	23.2	81	6.45	465.3	7.69	0.56	0.49	1.05	75.0777	22.239	23.2	0.0451166	0.0480535	15.2785	0.00260137	0.341288	5.30819	3.90226	0.157458	0.0175685	0.0885462																						0.287	0.02296	0.0956667
Giles Run	SW	2016-07-28	Summer	0.0115	25.9	48	3.9	526	7.46	0.58	0.47	1.05	31.9284	28.1985	50.1	0.0250835	0.0908073	27.6906	0.0031223	0.0947873	5.28249	3.95255	0.715447	0.0134051	0.124763																						0.0115	0.00092	0.000569307
Giles Run	SW	2016-08-01	Summer	0.0391	25.7	77	6.4	349.8	7.43	0.29	0.402	0.692	21.113	22.966	14.3	0.0138859	0.0719273	22.8875	0.00226497	0.516385	5.77486	6.14206	0.441833	0.00800943	0.10087																						0.0391	0.003128	0.1955
Giles Run	SW	2016-09-07	Summer	0.0211	22.3	80	6.9	504	6.72	0.113	0.0835	0.1965	18.853	18.182	5.05	0.0113661	0.68465	34.3938	0.00286265	0.0596747	6.89824	10.8981	0.500131	0.0145999	0.164561																						0.0211	0.001688	0.00113441
Giles Run	SW	2016-09-14	Summer	0.0163	22.8	82	7.1	447.9	7.02	0.1105	0.137	0.2475	19.041	25.317	11.3	0.0123237	0.0928073	32.0738	0.0016379	0.251852	6.75807	9.8845	0.627445	0.018838	0.150901																						0.0163	0.001304
Giles Run	SW	2016-09-21	Summer	0.0388	21.96	85	7.5	358	7	0.29	0.158	0.448	20.8305	21.735	3.04	0.0166572	0.0873001	26.0386	0.00348319	0.564744	5.28858	6.8954	0.435865	0.0140025	0.134307																						0.0388	0.003104	0.0646667
Giles Run	HZ	2016-09-28	Fall	0.0388	19.1	90	8.4	211	6.62	0.385	0.105	0.49	24.127	0.5	26.4	0.0193536	0.292062	15.9856	0.00477816	0.199455	4.48517	3.4739	0.210722	0.0305815	0.082877	20.5	38	3.4	260	6.62	0.476	0.141	0.617	27.9875	12.098	25.5	0.0360777	0.0582064	19.4224	0.00303738	0.0766446	6.27471	6.02074	0.059615	0.0208171	0.093888	0.0388	0.003104	0.097
Giles Run	HZ	2016-10-05	Fall	0.092	17.8	88	8.6	382.6	6.63	0.564	0.161	0.725	20.925	27.2205	7.04	0.0219644	0.242724	29.0954	0.0190114	0.529532	6.6603	7.83249	0.953779	0.0411113	0.135172	19.6	17	1.6	420.9	6.37	0.2	3.122	3.322	18.853	18.633	31.5	0.041524	0.419418	26.8109	0.00313536	52.2103	6.40913	6.53646	4.59073	0.0170644	0.137385	0.092	0.00736	0.46
Giles Run	HZ	2016-10-19	Fall	0.0361	17.1	85	8.2	414.1	6.69	0.58	0.093	0.673	21.231	16.383	2.92	0.0123799	0.133383	29.6005	0.00270098	0.206162	7.41026	9.17962	0.657937	0.00758002	0.147474	17.8	61	5.4	419.4	6.72	0.025	0.17	0.195	22.76	24.596	56.5	0.0448089	0.152535	29.1322	0.00307494	1.01141	7.78561	8.44805	0.547975	0.0145999	0.155407	0.0361	0.002888	0.1805
Giles Run	HZ	2016-11-02	Fall	0.0279666	13.3	81	8.7	421.7	6.43	0.431	0.0764	0.5074	18.396	20.168	3.46	0.0298985	0.0671851	13.5386	0.00451688	0.430902	3.54845	2.90035	0.310639	0.00533962	0.0711037	17.1	35	3.4	399.5	6.54	0.04	1.0201	1.0601	19.048	10.67	37.5	0.0218146	0.214582	20.0276	0.00169995	16.4665	4.74011	4.82708	2.55647	0.0176245	0.105261	0.0279666	0.00223733
Giles Run	HZ	2016-11-09	Fall	0.100095	12.5	76	8	445.9	6.34	0.3655	0.05	0.4155	20.026	27.952	19.4	0.0163844	0.119985	32.1248	0.00151869	0.266554	8.75216	8.17699	0.416475	0.0208171	0.143626	13.9	22	2.2	453.2	6.57	0.172	0.0262	0.1982	19.863	13.313	34.5	0.01284	0.15245	33.287	0.0026079	0.0481712	8.09036	8.11185	0.00915915	0.0145439	0.146945	0.100095	0.0080076	0.0238321
Giles Run	HZ	2016-11-16	Fall	0.0278052	9.6	84	9.6	435.6	6.75	0.433	0.074	0.507	20.794	17.776	12.6	0.0120161	0.118004	30.4504	0.00156931	0.189941	7.28949	10.5074	0.662816	0.0153841	0.15935	12.6	29	3.2	421.4	6.74	0.042	0.7535	0.7955	34.56	13.884	39.5	0.0179359	0.204155	23.0638	0.00352401	14.5041	5.74488	7.43051	2.35073	0.00795342	0.133712	0.0278052	0.00222442
Giles Run	HZ	2016-11-30	Fall	0.0594	10.9	79	8.7	380	6.17	0.322	0.088	0.41	24.29	14.741	9.34	0.00972095	0.110446	24.8708	0.00169505	0.160326	7.43994	9.34269	0.393942	0.0140025	0.130217	12.1	18	2	426.4	6.65	0.03	1.185	1.215	27.0215	3.743	40.5	0.0169114	0.177419	19.5915	0.00282019	16.6041	5.3179	6.80248	2.79144	0.00468617	0.123955	0.0594	0.004752	0.0424286
Giles Run	HZ	2016-12-07	Fall	0.0436026	10.25	81.5	9.15	407.8	6.46	0.596	0.138	0.734	34.779	17.24	10.97	0.0342801	0.0752051	16.9673	0.00247889	0.901273	5.85812	4.80064	0.250198	0.0115754	0.0824843	10.4	26	2.7	355.1	6.53	0.033	0.057	0.09	43.082	26.238	46.5	0.0173902	0.146044	23.7021	0.00212943	4.6973	5.93382	7.13816	0.925417	0.00614243	0.127864	0.0436026	0.00348821	0.072671
Giles Run	HZ	2016-12-14	Fall	0.0594	10.9	79	8.7	380	6.17	0.46	0.11	0.57	29.53	15.99	9.34	0.0220005	0.0928254	20.919	0.00208697	0.530799	6.64903	7.07167	0.32207	0.012789	0.10635	11.25	22	2.35	390.75	6.53	0.03	0.62	0.65	35.05	14.99	43.5	0.0171508	0.161732	21.6468	0.00247481	10.6507	5.62586	6.97032	1.85843	0.0054143	0.125909	0.0594	0.004752
Giles Run	HZ	2017-01-18	Winter	0.0879	7.9	111	13.1	746	5.78	0.679	0.082	0.761	22.76	17.031	5.03	0.0122943	0.139696	29.9855	0.00662998	0.387977	6.77666	7.90373	0.609479	0.00830815	0.175843	9.7	43	4.9	653	6.05	0.037	0.559	0.596	40.242	14.832	45	0.02289	0.24013	28.7908	0.00313863	16.0388	6.64818	9.44146	2.17438	0.0148613	0.162141	0.0879	0.007032	0.4395
Giles Run	HZ	2017-01-25	Winter	0.0879	7.9	111	13.1	746	5.78	0.309	0.085	0.394	38.915	18.046	5.03	0.0342667	0.110229	25.5195	0.00363669	0.602061	6.49399	6.90236	0.550141	0.0098951	0.128018	10.2	82	9	416.4	6.47	0.586227	0.025	0.611227	36.934	18.554	26.5	0.0174758	0.0948103	23.0569	0.00372651	0.210691	6.47002	6.73334	0.00635668	0.0113327	0.126311	0.0879	0.007032
Giles Run	HZ	2017-02-01	Winter	0.0879	7.9	111	13.1	746	5.78	0.258	0.154	0.412	37.924	14.324	5.03	0.0174838	0.164914	32.8324	0.00361383	0.779462	6.96019	9.38054	1.10364	0.0117994	0.187601	6.8	19	2.3	420.7	6.57	0.025	0.634	0.659	48.227	21.43	40.5	0.0221891	0.181029	22.158	0.00333132	15.5004	6.24019	7.23867	1.87539	0.0156455	0.127805	0.0879	0.007032
Giles Run	HZ	2017-02-08	Winter	0.0464806	4.4	106	13.8	764	6.52	0.1145	5.586	5.7005	61.302	41.866	8.52	0.0666637	0.220869	58.9702	0.00863857	2.2581	16.4768	13.1932	3.09025	0.0305815	0.251084	13	23	2.4	1008	6.49	0.025	7.837	7.862	92.407	60.138	54.5	0.0968216	0.206698	72.5997	0.0153747	0.532428	33.0717	10.6327	2.19294	0.0493075	0.224151	0.0464806	0.00371845
Giles Run	HZ	2017-02-17	Winter	0.0536942	10.5	58	6.4	845	6.37	0.148	0.656	0.804	64.274	15.001	9.86	0.0183104	0.163646	30.8508	0.00141418	1.1002	7.51249	9.37189	4.50467	0.0257273	0.166333	10.4	35	4	1003	6.26	0.025	1.957	1.982	60.114	30.836	33.5	0.102247	0.486371	58.081	0.00651404	56.571	9.34951	19.7505	6.69591	0.0451254	0.323643	0.0536942	0.00429554
Giles Run	HZ	2017-02-22	Winter	0.0333	5.86	40	10.1	540	5.88	0.115	0.655	0.77	64.076	13.715	4.32	0.0198833	0.164953	29.8915	0.00530398	1.06621	7.3636	9.3225	3.68946	0.0246631	0.158632	14.1	35	3.5	553.9	6.5	0.025	0.531	0.556	66.652	12.632	38.5	0.0253858	0.0812254	30.7523	0.00306514	0.816167	7.54876	9.5631	1.11273	0.0143386	0.16329	0.0333	0.002664
Giles Run	HZ	2017-03-01	Winter	0.0434311	9.5	110	12.6	516.6	6	0.13	0.66	0.79	64.18	14.36	4.59	0.0190968	0.1643	30.3712	0.00335908	1.0832	7.43804	9.34719	4.09707	0.0251952	0.162483	12.25	35	3.75	778.45	6.38	0.025	1.24	1.265	63.38	21.73	36	0.0638161	0.283798	44.4166	0.00478959	28.6936	8.44914	14.6568	3.90432	0.029732	0.243466	0.0434311	0.00347449	0.0361926
Giles Run	HZ	2017-03-17	Winter	0.0962	6.9	118	14.4	993	6	0.492	0.173	0.665	15.501	7.997	4.41	0.0254553	0.154779	29.4342	0.00272711	0.917703	7.16623	7.77751	1.54028	0.0181472	0.163338	8.5	5	0.6	691.2	6	0.025	2.2115	2.2365	22.978	0.25	44.5	0.022585	0.259561	30.7231	0.00386694	33.4048	6.37184	8.84947	3.27075	0.0151787	0.153176	0.0962	0.007696	0.160333
Giles Run	HZ	2017-03-22	Winter	0.0849	10.1	119	13.6	659	6.7	0.413	0.135	0.548	5.064	14.527	4.46	0.0242088	0.132411	27.5766	0.00219965	0.875339	6.98501	7.77786	1.14245	0.0126769	0.155661	13.7	13	1.4	1464	6.5	0.058	4.572	4.63	23.2115	0.25	14	0.0807636	0.357521	46.3494	0.00315169	65.8707	9.58773	15.7571	5.24024	0.0148987	0.245459	0.0849	0.006792
Giles Run	HZ	2017-03-29	Spring	0.0697	15.6	117	11.7	361.7	7.3	0.407	0.145	0.552	7.79	10.602	6.97	0.0177513	0.122814	25.0389	0.00262423	0.400172	8.15577	7.27797	0.935551	0.0143946	0.131406	19.5	16	1.5	803	6.63	0.03	2.083	2.113	12.853	0.25	15	0.0468607	0.208564	26.9793	0.00363179	11.1485	10.5203	6.80269	1.42158	0.0179792	0.134968	0.0697	0.005576
Giles Run	HZ	2017-04-05	Spring	0.0773	12.85	118	12.65	510.35	7	0.314	0.448	0.762	7.712	14.392	5.715	0.0155311	0.110199	24.7663	0.00229763	0.604051	8.03643	6.9468	0.813348	0.0141332	0.144208	19.4	15	1.4	754	6.69	0.036	2.646	2.682	13.476	0.25	22	0.0266002	0.208885	24.8555	0.00305698	16.7451	9.99664	7.0631	1.79466	0.0132744	0.13736	0.0773	0.006184
Giles Run	HZ	2017-04-12	Spring	0.0792	16.5	118	11.4	536.7	7.28	0.294	0.693	0.987	7.868	16.76	2.83	0.0208008	0.124574	27.0105	0.00219965	0.48389	6.18499	8.33261	0.926411	0.0127329	0.150337	18.8	28	2.6	611	6.72	0.042	2.612	2.654	16.124	0.25	17	0.0192734	0.190907	25.6655	0.00321374	8.76211	8.32647	7.75421	1.25868	0.0112393	0.144858	0.0792	0.006336
Giles Run	HZ	2017-04-19	Spring	0.0647	17.2	112	10.9	437.7	7.3	0.3205	0.144	0.4645	11.139	5.527	3.1	0.0101035	0.110409	22.4138	0.00355831	0.408502	6.42254	8.45168	0.699616	0.0139278	0.122382	15.5	24	2.4	644	6.73	0.0355	2.362	2.3975	19.862	0.25	23	0.0292939	0.221249	25.0784	0.00367262	18.5992	7.7203	7.41348	1.98464	0.00898027	0.147717	0.0647	0.005176
Giles Run	HZ	2017-05-03	Spring	0.04	15.4	100	10.1	492.3	7.16	0.31	0.42	0.73	9.5	11.14	7.35	0.0154521	0.117491	24.7121	0.00287898	0.446196	6.30377	8.39214	0.813013	0.0133304	0.136359	17.15	26	2.5	627.5	6.725	0.04	2.49	2.53	17.99	0.25	20	0.0242837	0.206078	25.372	0.00344318	13.6807	8.02338	7.58385	1.62166	0.0101098	0.146287	0.04	0.0032
Giles Run	HZ	2017-05-18	Spring	0.0716	21.4	93	8.2	362.3	7.22	0.493	0.076	0.569	17.202	19.636	5.75	0.0139903	0.123209	29.1057	0.00229763	0.675811	6.05542	7.94652	0.845247	0.0144319	0.141145	22.2	23	2	456	6.69	0.048	0.161	0.209	30.101	14.629	20	0.0150068	0.0320231	1.27209	0.00275324	3.62158	1.70513	0.531366	0.280408	0.00701992	0.0170035	0.0716	0.005728	0.0035098
Giles Run	HZ	2017-05-25	Spring	0.886	17.6	92	8.5	120	7.45	0.445	0.1345	0.5795	35.527	7.016	27.1	0.44008	0.1273	15.8831	0.00941588	1.31091	5.43479	3.93131	0.181032	0.0213958	0.0730172	15.3	16	1.5	399	6.8	0.084	0.845	0.929	22.533	1.94	12.5	0.0268356	0.165133	25.2508	0.00428662	8.16689	6.50174	6.73357	1.34833	0.0146746	0.129672	0.886	0.07088	0.0351587
Giles Run	HZ	2017-06-01	Spring	0.166	20.3	81	7.3	275.2	7.36	0.474	0.045	0.519	26.912	14.223	8.32	0.0373109	0.0911614	23.776	0.00415109	0.588464	7.37994	5.73857	0.427869	0.00511558	0.107357	20.8	24	2.2	278.4	6.99	0.168	0.296	0.464	28.435	2.82	16.3	0.0777863	0.189574	25.0772	0.00576449	6.58953	7.65864	5.40837	1.36113	0.0238789	0.114214	0.166	0.01328
Giles Run	HZ	2017-06-06	Spring	0.068	21.1	90	7.9	324.7	7.4	0.778	0.379929	1.15793	28.244	15.407	17.71	0.258464	0.069367	22.5273	0.00270262	1.6495	7.47481	6.88997	0.579247	0.0117621	0.119498	22.1	63	6.5	320.4	7.36	0.885	0.23175	1.11675	25.48	10.467	14.4	0.0822081	0.0564268	24.2155	0.0058592	0.382788	7.19788	6.44954	0.0718883	0.0173818	0.121117	0.068	0.00544	0.34
Giles Run	HZ	2017-06-15	Spring	0.117	23.9	65	7.1	323.4	7.33	0.56	0.106	0.666	38.97	10.805	4.92	0.0145547	0.103858	24.7975	0.00178487	0.202178	6.02617	7.40371	0.365708	0.0160749	0.131599	23.7	26	2.2	210.2	6.94	0.275	0.086	0.361	36.81	1.636	0	2.9955	1.55054	23.4924	0.00498392	6.93939	6.97482	7.11929	1.00177	0.0176992	0.131793	0.117	0.00936
Giles Run	HZ	2017-06-22	Spring	0.0155	23.1	70	6	383.3	7.27	0.615	1.009	1.624	25.579	13.11	5.53	0.016058	0.0870015	26.1789	0.00223884	0.0363221	8.09085	7.75438	0.00560943	0.00524627	0.134823	24.2	25	2.2	378.4	7.05	0.4235	3.327	3.7505	24.056	6.05	23.5	0.0141829	0.101326	27.3951	0.0024446	0.620508	7.77129	7.46784	0.574672	0.00843884	0.138431	0.0155	0.00124
Giles Run	HZ	2017-06-29	Summer	0.06625	23.5	67.5	6.55	353.35	7.3	0.59	0.56	1.15	19.75	11.96	5.225	0.0153063	0.0954298	25.4882	0.00201186	0.11925	7.05851	7.57904	0.185659	0.0106606	0.133211	23.95	25.5	2.2	294.3	7	0.39	1.71	2.1	30.43	3.84	11.75	1.50484	0.825931	25.4438	0.00371426	3.77995	7.37305	7.29356	0.78822	0.013069	0.135112	0.06625	0.0053
Giles Run	HZ	2017-07-07	Summer	0.0155	23.1	70	6	383.3	7.27	0.3975	0.0841	0.4816	21.55	13.072	5.53	0.0521669	0.0977301	24.6983	0.00624998	0.514585	6.93822	5.89399	0.504769	0.020231	0.116204	25.4	38	3.1	346.4	7.12	0.085	0.1599	0.2449	25.16	11.685	30	0.0390871	0.0873987	19.0477	0.00456166	0.111916	6.81391	6.28845	0.0134602	0.0161995	0.112663	0.0155	0.00124	0.0110714
Giles Run	HZ	2017-07-14	Summer	0.184	23.7	74	6.1	233.1	7.12	0.49	0.32	0.81	30.68	12.52	42.2	0.0337366	0.09658	25.0932	0.00413092	0.316917	6.99836	6.73652	0.345214	0.0154458	0.124707	25.4	38	3.1	346.4	7.12	0.24	0.93	1.17	27.8	7.76	20.88	0.771965	0.456665	22.2457	0.00413796	1.94593	7.09348	6.79101	0.40084	0.0146343	0.123887	0.184	0.01472	0.23
South Branch	SW	2014-06-20	Summer	0.00351933	22.6	73	6.3	295.8	6.89	0.252444	0.120667	0.373111	17.5482	9.53029		0.0231349	0.066745	21.2024	0.00256816	0.3409	6.8923	9.4323	0.129212	0.0148157	0.173271																						0.00351933	0.00264611
South Branch	SW	2014-06-26	Summer	0.0044351	22.9	61	5.2	290.7	7.03	0.251833	0.120667	0.3725	16.1487	10.158		0.0220411	0.0662622	20.2356	0.00232213	0.363766	6.84954	9.17878	0.127847	0.016274	0.166135																						0.0044351	0.00333466	0.0017461
South Branch	SW	2014-07-01	Summer	0.0018755	24	38	3.2	240.5	7.1	0.229	0.127	0.356	17.193	11.4679		0.0201481	0.069114	20.5006	0.00261933	0.483466	7.0437	9.96526	0.10799	0.0151227	0.18525																						0.0018755	0.00141015
South Branch	SW	2014-07-10	Summer	0.0143665	22.3	60	5.2	205.5	7.19	0.2765	0.115	0.3915	19.303	6.965		0.0272155	0.0648586	22.871	0.00276304	0.175469	6.78367	9.15285	0.1518	0.0130503	0.168428																						0.0143665	0.0108019	0.00161603
South Branch	SW	2014-07-17	Summer	0.0056996	21.2	45	4	207.7	6.94	0.25	0.12	0.37	11.95	12.041		0.0187598	0.0648141	17.3353	0.00158401	0.432363	6.72124	8.41824	0.123751	0.020649	0.144727																						0.0056996	0.00428541
South Branch	SW	2014-07-24	Summer	0.0025666	22.4	37	3.2	251.8	6.99	0.104	0.122	0.226	24.929	11.65		0.0778693	0.0720436	22.2626	0.00504434	0.629236	6.38795	10.4292	0.122679	0.0171204	0.175905																						0.0025666	0.00192978	0.00144353
South Branch	SW	2014-08-01	Summer	0.00229852	25.5	55	5	252.7	7.08	0.18	0.12	0.3	18.44	11.85		0.0483145	0.0684289	19.7989	0.00331417	0.530799	6.55459	9.42371	0.123215	0.0188847	0.160316																						0.00229852	0.00172821
South Branch	SW	2014-08-07	Summer	0.00213923	22.3	46	4	249.4	7.13	0.1095	0.116	0.2255	19.772	14.175		0.0180589	0.0700612	21.1886	0.0019547	0.285451	6.81192	9.82844	0.090771	0.0117061	0.152595																						0.00213923	0.00160845
South Branch	SW	2014-08-15	Summer	0.0043332	19	44	4.1	230	6.89	0.1025	0.129	0.2315	23.523	1.954		0.0246207	0.0654862	19.3018	0.00250829	0.322009	6.92164	9.2187	0.135529	0.00810278	0.152248																						0.0043332	0.00325805
South Branch	SW	2014-09-05	Summer	0.00328772	23.9	63	5.4	146	7	0.135	0.093	0.228	20.71	11.832		0.0168017	0.0631674	19.8824	0.00348972	0.298222	6.22313	10.2096	0.0865088	0.0123595	0.151114																						0.00328772	0.00247197
South Branch	SW	2014-09-12	Summer	0.00281124	20.7	39	3.9	272.8	7.6	0.8075	0.122	0.9295	22.351	19.667		0.0234089	0.0705723	22.6958	0.00250829	0.261737	7.03013	10.258	0.106321	0.0155334	0.174547																						0.00281124	0.00211372	0.000651052
South Branch	SW	2014-09-19	Summer	0.00576422	18.7	41	3.9	268.6	7.3	0.7205	0.143	0.8635	23.288	16.439		0.0117994	0.068363	22.6438	0.00189755	0.294478	7.39977	11.6966	0.0616572	0.0114821	0.17649																						0.00576422	0.004334
South Branch	SW	2014-10-03	Fall	0.00245447	17.6	43	4	246.1	7.65	0.622	0.103	0.725	20.71	17.871		0.011441	0.0689481	23.8438	0.00282999	0.274848	6.51549	11.4977	0.0705864	0.0157761	0.174813																						0.00245447	0.00184547	0.00245447
South Branch	SW	2014-10-10	Fall	0.00482364	15.1	54	5.5	296.7	7.38	1.717	0.11	1.827	17.662	20.3955		0.0154963	0.13161	25.6934	0.00488757	0.236939	7.71746	12.556	0.0661517	0.0145813	0.197954																						0.00482364	0.0036268
South Branch	SW	2014-10-17	Fall	0.00319709	15.1	76	7.6	258.3	7.45	0.5745	0.018	0.5925	22.116	15.919	12.8	0.0137335	0.282432	21.0277	0.00266995	0.388653	6.86672	11.0331	0.10058	0.018502	0.161629																						0.00319709	0.00240383	0.00228363
South Branch	SW	2014-10-24	Fall	0.00343735	13.7	57	5.3	259.6	7.51	0.6645	0.078	0.7425	39.51	19.068	4.51	0.0157959	0.495771	22.9114	0.00251809	0.512557	7.31498	11.274	0.116819	0.00847618	0.178981																						0.00343735	0.00258447	0.00190964
South Branch	SW	2014-11-07	Fall	0.00236523	12.1	62	6.6	319.3	7.44	0.62	0.05	0.67	30.81	17.49	4.61	0.0147647	0.389102	21.9695	0.00259402	0.450605	7.09085	11.1536	0.1087	0.0134891	0.170305																						0.00236523	0.00177837
South Branch	SW	2014-11-14	Fall	0.00318869	8	84	10	281.2	7.85	0.64	0.06	0.7	35.16	18.28	13.8	0.0152803	0.442437	22.4404	0.00255605	0.481581	7.20291	11.2138	0.112759	0.0109826	0.174643																						0.00318869	0.00239751
South Branch	SW	2014-11-21	Fall	0.00485879	4.7	92	12	276.4	7.54	1.4655	0.05	1.5155	17.942	22.478	1.2	0.0200518	0.347488	21.7112	0.00254911	0.579824	6.75141	12.2859	0.0910483	0.00810278	0.166255																						0.00485879	0.00365322
South Branch	SW	2014-12-12	Fall	0.00546099	6.5	88	10.7	262.7	7.41	0.065	0.072	0.137	18.184	22.452	1.13	0.0174758	0.14147	21.1292	0.00237765	0.555011	6.41272	11.0374	0.0791591	0.017027	0.156828																						0.00546099	0.00410601
South Branch	SW	2014-12-19	Fall	0.00290301	5.7	91	11.4	251.1	7.45	0.012	0.442	0.454	9.62	19.901	2.18	0.0102078	0.278266	20.0893	0.00220782	0.636603	4.79587	8.38918	0.0774642	0.0139838	0.138654																						0.00290301	0.00218272
South Branch	SW	2015-01-02	Winter	0.00265868	4.3	91	12	249.9	7.55	0.05	0.483	0.533	13.34	18.157	1.95	0.012519	0.104217	21.2107	0.00197593	0.589212	6.07163	11.3077	0.0787812	0.0144879	0.162458																						0.00265868	0.00199901
South Branch	SW	2015-01-14	Winter	0.0094116	1.8	103	14.5	329.1	7.24	0.2235	0.432	0.6555	13.6785	30.856	47.3	0.0156407	0.345902	21.1689	0.00351585	0.512473	6.09026	10.8469	0.0726106	0.0120421	0.153707																						0.0094116	0.00707639
South Branch	SW	2015-01-21	Winter	0.00795151	3.2	106	14.2	322.8	7.05	0.1355	0.422	0.5575	14.467	20.266	12.1	0.0188133	0.131471	22.4722	0.0029492	0.562341	5.2634	9.36982	0.0639844	0.0181472	0.147865																						0.00795151	0.00597858	0.00993939
South Branch	SW	2015-01-28	Winter	0.0120526	3.2	103	13.9	498.7	7.07	0.25	0.05	0.3	15.707	18.444	6.16	0.022783	0.333974	29.4227	0.00239888	0.442981	6.91193	13.2387	0.0814413	0.0210784	0.195907																						0.0120526	0.00906209
South Branch	SW	2015-02-04	Winter	0.00683313	3	107	14.6	362.3	7.25	0.234	0.05	0.284	6.71	21.958	5.48	0.0216087	0.125223	21.7748	0.00272221	0.435981	5.80407	10.8321	0.0706903	0.0102685	0.148364																						0.00683313	0.00513769
South Branch	SW	2015-02-11	Winter	0.00548115	4.8	109	14.1	304.4	7.34	0.445	0.05	0.495	9.5705	19.433	1.54	0.0167294	0.322136	22.3	0.000501331	0.511892	5.57752	11.1379	0.0679582	0.013013	0.154772																						0.00548115	0.00412116
South Branch	SW	2015-02-18	Winter	0.00615714	0.1	116	16.7	293.7	7.13	0.481	0.05	0.531	7.544	21.021	5.74	0.0260064	0.537773	23.042	0.00282182	0.496184	5.45182	10.3243	0.115088	0.00655317	0.154133																						0.00615714	0.00462943	0.0027987
South Branch	SW	2015-02-25	Winter	0.00507378	0.2	124	17.9	439.6	7.48	0.212	0.05	0.262	7.5445	17.884	3.1	0.0201936	0.103399	23.9083	0.00131946	0.438908	6.11262	11.5471	0.0822401	0.0135171	0.164614																						0.00507378	0.00381488
South Branch	SW	2015-03-04	Winter	0.0236591	2.8	108	14.6	476.7	7.4	0.241	0.11	0.351	18.943	30.073	4.22	0.019161	0.204968	21.9804	0.00689453	0.26857	6.08048	10.3565	0.0526154	0.0164296	0.15421																						0.0236591	0.0177888	0.00268854
South Branch	SW	2015-03-25	Spring	0.00663828	5.6	108	13.8	269	7.54	0.186	0.076	0.262	14.4675	28.226	1.51	0.0200812	0.11	18.8755	0.0055522	0.363991	5.0563	8.74841	0.0529839	0.0160189	0.130865																						0.00663828	0.00499119
South Branch	SW	2015-04-01	Spring	0.00841009	10.1	103	12.2	237.3	7.09	0.69	0.0805	0.7705	50.731	20.476	3.25	0.0389346	0.08897	16.4027	0.0026275	0.25481	3.84502	6.55298	0.0514391	0.00965239	0.104223																						0.00841009	0.00632337
South Branch	SW	2015-04-08	Spring	0.00784025	11.2	92	10.2	253.1	7.85	0.05	0.087	0.137	15.73	28.212	2.48	0.0188802	0.077877	19.0177	0.00158891	0.361368	5.25832	9.463	0.0680085	0.0151227	0.141027																						0.00784025	0.00589492	0.00560018
South Branch	SW	2015-04-15	Spring	0.0435253	11.6	69	7.5	178.7	7.63	0.126	0.093	0.219	36.2715	20.449	15.3	0.0947886	0.0653822	12.7397	0.00342277	0.330109	4.83853	5.89152	0.0450186	0.0162429	0.0997169																						0.0435253	0.0327258	0.108813
South Branch	SW	2015-04-22	Spring	0.0214457	15	71	7.1	176	8.04	0.3565	0.1205	0.477	22.7915	21.008	6.42	0.039796	0.064191	12.4075	0.00313373	0.309264	4.56169	6.29009	0.0537013	0.0120795	0.0956648																						0.0214457	0.0161246
South Branch	SW	2015-04-29	Spring	0.00881029	14.6	99	10	236.7	7.24	1.0895	0.118	1.2075	13.392	23.4425	4.4	0.0167776	0.0774108	17.0704	0.00302023	0.234651	5.25014	8.99361	0.0749736	0.0149453	0.137105																						0.00881029	0.00662428
South Branch	SW	2015-05-06	Spring	0.00331476	19	88	8.3	266	7.23	1.007	0.1265	1.1335	18.548	26.184	4.33	0.0166867	0.0830033	19.0221	0.00808335	0.487084	6.37854	9.81731	0.0953019	0.0198462	0.143033																						0.00331476	0.0024923	0.0082869
South Branch	SW	2015-05-13	Spring	0.00242389	16.8	83	8.2	263.8	7.25	0.7145	0.135	0.8495	19.5175	26.967	11.7	0.0087312	0.0839079	19.6241	0.00184692	0.409434	6.8516	10.4973	0.108438	0.0116688	0.167475																						0.00242389	0.00182248
South Branch	SW	2015-05-19	Spring	0.00743958	19.7	87	7.9	267.8	7.43	0.8745	0.13	1.0045	25.9395	25.107	5.49	0.0197228	0.09282	20.8046	0.00476673	0.579463	6.8523	9.90629	0.0955354	0.0123595	0.15293																						0.00743958	0.00559367
South Branch	SW	2015-05-26	Spring	0.00497319	19.9	87	8	241.2	7.5	0.404	0.0597	0.4637	32.037	17.315	7.42	0.00800895	0.0789866	18.0409	0.00194	0.446301	5.68029	9.05932	0.101806	0.0104179	0.136438																						0.00497319	0.00373924
South Branch	SW	2015-06-16	Spring	0.000339059	23.3	86	7.2	254.2	7.44	0.1475	0.133667	0.281167	26.18	16.224	29.3	0.0199582	0.0523364	12.2	0.00501168	0.680633	4.94933	3.71019	0.0742985	0.0183526	0.0779279																						0.000339059	0.000254931
South Branch	SW	2015-06-24	Summer	0.000465121	21.8	79	6.9	198	7.18	0.496	0.148	0.644	28.647	29.877	30.6	0.0339324	0.0613147	15.1672	0.00615151	0.516018	7.67633	6.89759	0.119821	0.0249618	0.108006																						0.000465121	0.000349715
South Branch	SW	2015-06-30	Summer	0.00135348	19.6	84	7.7	284.6	7.4	0.816	0.14	0.956	27.41	44.537	15.5	0.041623	0.0856601	27.9108	0.0047357	0.523417	8.5834	10.875	0.102731	0.0206304	0.186815																						0.00135348	0.00101765
South Branch	SW	2015-07-09	Summer	0.00308091	22.7	86	7.5	212.6	7.02	0.66	0.14	0.8	28.03	26.1	32.1	0.0398468	0.063244	19.6772	0.00370854	0.613062	6.88507	6.56714	0.0878597	0.0139838	0.139582																						0.00308091	0.00231647
South Branch	SW	2016-05-18	Summer	0.0139	13.1	78.5	7.2	277	7.08	1.271	0.4465	1.7175	24.4895	33.234	3.29	0.0313965	0.0628412	17.4642	0.00461159	0.51085	6.84287	7.484	0.0565753	0.0270342	0.119061																						0.0139	0.0104511	0.0695
South Branch	SW	2016-05-23	Summer	0.0556	14	76	7	182.9	6.94	0.17	0.476	0.646	44.007	25.764	14.3	0.182472	0.0479555	11.9874	0.00378039	0.411288	5.43783	4.21779	0.0385973	0.0238229	0.0881207																						0.0556	0.0418045	0.139
South Branch	SW	2016-06-02	Summer	0.0134	18.5	81	7.4	270.6	7.15	0.777	0.532	1.309	150.288	32.115	12.8	0.0280206	0.0618495	17.5377	0.00264056	0.470512	6.58612	6.69877	0.0708069	0.0126956	0.121691																						0.0134	0.0100752	0.067
South Branch	SW	2016-06-06	Summer	0.00785	20.4	71	6.6	272.6	7.01	0.224	0.463	0.687	99.381	25.317	3.52	0.0209774	0.0643422	16.4076	0.00355667	0.602334	5.29988	6.82	0.0723496	0.0108099	0.132561																						0.00785	0.00590226	0.03925
South Branch	SW	2016-06-13	Summer	0.00443	19.7	77	6.8	280.2	7.42	0.5	0.5	1	124.83	27.219	20	0.0244281	0.0590693	16.0799	0.00316965	0.41234	6.51646	6.59256	0.0745386	0.0216012	0.108339																						0.00443	0.00333083
South Branch	SW	2016-06-27	Summer	0.00354	22	69	6	278.5	7.72	0.459	0.463	0.922	29.48	19.273	4.59	0.0143995	0.197739	12.2958	0.00503944	0.556042	4.15227	4.72819	0.0451724	0.0130877	0.0877704																						0.00354	0.00266165	0.000188298
South Branch	SW	2016-07-05	Summer	0.0111	20.85	73	6.4	279.35	7.57	0.48	0.48	0.96	77.16	30.101	7.63	0.0262926	0.0513489	12.1961	0.00333949	0.441641	5.42079	6.46001	0.0508048	0.0255032	0.091938																						0.0111	0.00834586	0.0037
South Branch	SW	2016-07-28	Summer	0.00147	24.2	70	5.8	261.1	7.5	0.47	0.47	0.94	53.32	24.309	7.97	0.0176283	0.0586165	16.2407	0.00237112	0.569478	6.82645	6.74719	0.0821084	0.0170457	0.11756																						0.00147	0.00110526	7.27723e-05
South Branch	SW	2016-08-01	Summer	0.00322	24.2	68	6.1	262.7	7.33	0.112	0.30875	0.42075	43.714	24.505	5.7	0.0196479	0.0641126	16.8429	0.00380489	0.75889	4.96308	6.84262	0.111587	0.0100071	0.136348																						0.00322	0.00242105	0.0161
South Branch	SW	2016-09-07	Summer	0.002345	22.7	91	7.9	206.1	7.19	0.155	0.092	0.247	29.023	19.665	55.9	0.0183585	0.0547961	16.2971	0.00252788	0.420341	5.8873	8.94551	0.0923285	0.0123035	0.127576																						0.002345	0.00176316	0.000126075
South Branch	SW	2016-09-14	Summer	0.00254	22.6	89	7.7	236.1	7.35	0.1855	0.168	0.3535	29.023	25.317	2.81	0.0191423	0.0585038	16.4112	0.00623643	0.505017	4.97462	8.20315	0.0883824	0.022516	0.126345																						0.00254	0.00190977
South Branch	SW	2016-09-21	Summer	0.00141	21.3	85	7.6	253	7.19	0.454	0.186	0.64	22.808	32.563	12.2	0.0188588	0.0701858	17.6394	0.00378856	0.622843	5.06122	8.30641	0.12643	0.0135731	0.128276																						0.00141	0.00106015	0.00235
South Branch	HZ	2016-09-28	Fall	0.00952	18.3	79	7.5	251.9	6.85	1.331	0.101	1.432	45.409	15.776	0.00952	0.0227723	0.0597171	15.2685	0.00280713	0.330978	4.75251	6.11221	0.0537945	0.0142639	0.110353	19.1	29	2.9	441	6.49	0.051	1.231	1.282	23.938	9.206	18.75	0.0264905	0.168479	42.5327	0.00137662	36.3745	5.58214	18.9092	1.66672	0.0105486	0.32935	0.00952	0.00715789	0.0238
South Branch	HZ	2016-10-05	Fall	0.00272	17.4	89	8.6	270.9	6.37	0.572	0.124	0.696	27.517	27.274	0.00272	0.0153277	0.0760516	21.7429	0.00285122	0.551068	6.88652	9.90766	0.109659	0.0123222	0.141237	17.9	22	2.1	253.5	6.24	0.025	1.563	1.588	20.925	29.381	41	1.03265	0.318522	15.2171	0.00500351	34.578	5.39191	6.91562	1.35589	0.00556366	0.107134	0.00272	0.00204511	0.0136
South Branch	HZ	2016-10-19	Fall	0.00278	17.2	81	7.7	287	6.68	0.593571	0.207	0.800571	34.342	45.806	0.00278	0.0306502	0.0999711	22.8629	0.00640626	0.283807	9.02141	11.5736	0.0841362	0.0120235	0.172224	18.1	38	3.4	298.1	6.56	0.550286	1.055	1.60529	27.131	3.172	29.88	0.0664176	0.144339	24.8703	0.00171628	12.7252	6.20257	10.878	1.18767	0.0153094	0.175152	0.00278	0.00209023	0.0139
South Branch	HZ	2016-11-02	Fall	0.00275122	13.5	81.1	8.5	290.9	6.42	0.515	0.05	0.565	21.003	31.095	0.00275122	0.0137789	0.107534	24.5668	0.00327253	0.460862	7.6403	12.2101	0.0494665	0.0085882	0.175741	15.1	47	4.8	167.1	6.53	0.552	0.025	0.5605	38.274	29.095	17.5	0.0223042	0.065185	11.4916	0.00286755	0.0737648	4.08958	5.24566	0.00399797	0.0104925	0.0931604	0.00275122	0.00206858
South Branch	HZ	2016-11-09	Fall	0.00813347	12.7	72.1	7.6	286.1	6.75	0.523	0.2932	0.8162	37.785	24.667	0.00813347	0.0102881	0.088232	23.1839	0.00318272	0.292509	9.73753	11.7741	0.0676102	0.00440612	0.157107	14	16	1.7	274.4	6.72	0.222	0.2932	0.5152	21.981	19.347	20.5	0.476674	0.133816	23.4789	0.0039241	2.77571	8.39576	10.4039	1.26149	0.0140025	0.165177	0.00813347	0.00611539	0.00193654
South Branch	HZ	2016-11-16	Fall	0.00497779	10.5	75	8.3	289.5	5.58	0.2406	0.071	0.3116	25.601	30.987	0.00497779	0.0167589	0.0876892	22.4362	0.00769306	0.591825	7.48044	12.3828	0.059085	0.0226094	0.170538	12.8	16	1.7	299.3	6.34	0.1704	0.939	1.1094	37.619	13.634	45.5	0.249489	0.0995007	17.4853	0.00339582	1.42474	6.24267	7.82478	0.632746	0.0122475	0.129168	0.00497779	0.0037427
South Branch	HZ	2016-11-30	Fall	0.024	11.3	81	8.8	290.7	6.24	0.181571	0.075	0.256571	27.349	27.917	0.024	0.0145467	0.0915651	21.6164	0.00235479	0.249344	8.0292	12.5807	0.0432489	0.0195288	0.173007	14.3	26	2.6	265	6.26	0.116571	0.43	0.546571	35.434	11.706	46.5	0.0213077	0.0942025	9.95375	0.00225272	30.6706	4.5931	6.69373	1.3723	0.0107072	0.0867299	0.024	0.0180451	0.0171429
South Branch	HZ	2016-12-07	Fall	0.0144889	10.9	78	8.55	290.1	5.91	0.483286	0.067	0.550286	44.612	29.845	0.0144889	0.0216702	0.0855096	19.8255	0.00236622	0.54423	7.811	10.2935	0.0763137	0.0141332	0.151869	12.1	42	4.5	263.9	6.49	0.321429	0.3105	0.631929	26.912	18.311	34.5	0.0189872	0.114668	13.8334	0.00185672	32.1192	5.05249	8.10965	1.24383	0.00965239	0.111171	0.0144889	0.0108939	0.0241482
South Branch	HZ	2016-12-14	Fall	0.024	11.3	81	8.8	290.7	6.24	0.33	0.07	0.4	35.98	28.88	0.024	0.0181084	0.0885374	20.7209	0.0023605	0.396787	7.9201	11.4371	0.0597813	0.016831	0.162438	13.2	34	3.55	264.45	6.375	0.22	0.37	0.59	31.17	15.01	40.5	0.0201474	0.104435	11.8936	0.00205472	31.3949	4.8228	7.40169	1.30806	0.0101798	0.0989503	0.024	0.0180451
South Branch	HZ	2017-01-18	Winter	0.00373794	8.9	117	13.5	365.7	6.25	0.543	0.06	0.603	25.601	25.997	0.00373794	0.0165181	0.0952739	24.1439	0.00388164	0.303091	7.69526	13.8417	0.039709	0.00836416	0.181239	14.1	37	3.9	154.6	6.23	0.221	0.535	0.756	37.182	4.038	33.5	0.0185217	0.135841	12.3101	0.00302595	44.8003	5.01701	7.03146	1.44767	0.00668386	0.105567	0.00373794	0.00281048	0.0186897
South Branch	HZ	2017-01-25	Winter	0.00373794	8.9	117	13.5	365.7	6.25	0.67	0.078	0.748	54.566	25.761	0.00373794	0.0268704	0.0819473	20.8383	0.00398125	0.290635	7.38586	10.3721	0.0401094	0.0177552	0.14229	10.1	17	1.9	336.8	6.6	0.025	0.028	0.053	56.944	30.193	36.5	0.0150389	0.0894087	23.8367	0.0045773	0.0975676	7.36325	12.0687	0.0239273	0.0156641	0.162474	0.00373794	0.00281048
South Branch	HZ	2017-02-01	Winter	0.00373794	8.9	117	13.5	365.7	6.25	0.427	0.081	0.508	64.671	25.896	0.00373794	0.0187705	0.0910512	21.7595	0.00349299	0.483162	6.82671	11.5052	0.0655427	0.0122475	0.160799	7.3	17	2.1	252.2	6.34	0.025	0.833	0.858	49.811	1.974	27.5	0.0347135	0.131527	11.2135	0.00412333	42.0166	4.55809	6.87368	1.37497	0.0118928	0.0850484	0.00373794	0.00281048
South Branch	HZ	2017-02-08	Winter	0.00428098	4.8	101	12.9	307.1	6.54	0.22	0.062	0.282	67.444	24.847	0.00428098	0.00919933	0.0837474	20.1138	0.00435031	0.395407	7.00609	11.2001	0.0455986	0.0108659	0.135497	15.4	24	2.6	258.2	6.44	0.025	0.988	1.013	75.369	7.083	32.5	0.0231013	0.121259	12.2187	0.00339011	45.236	5.0305	7.10579	1.41733	0.00151227	0.0995995	0.00428098	0.00321878
South Branch	HZ	2017-02-17	Winter	0.00598635	10.8	113	12.4	289	6.94	0.603	0.097	0.7	69.425	26.336	0.00598635	0.0139662	0.0855575	21.2326	0.00269772	0.464245	6.91324	11.8381	0.0513238	0.0203316	0.15359	7.7	17	2.7	157.7	6.26	0.025	0.748	0.773	73.586	0.25	41.5	0.0320278	0.13775	6.18232	0.00479449	35.3101	3.10124	3.09569	0.989756	0.0275756	0.0505216	0.00598635	0.00450102
South Branch	HZ	2017-02-22	Winter	0.00397	6	103	12.8	300	6.3	0.177	0.066	0.243	70.416	29.99	0.00397	0.0143193	0.081853	19.7667	0.00299819	0.25325	6.97228	11.2731	0.0362505	0.0115941	0.157557	14.6	37	3.7	345.9	6.5	0.7283	0.178	0.9063	78.737	22.614	26.5	0.0153117	0.0960182	20.5437	0.00308964	0.153383	7.34103	11.2194	0.459409	0.0202196	0.161563	0.00397	0.00298496
South Branch	HZ	2017-03-17	Winter	0.00548889	7.7	117	12.3	378.3	6	0.39	0.08	0.47	69.92	28.16	0.013	0.0169087	0.0909053	20.8598	0.00236785	0.368855	7.01249	11.5816	0.044174	0.0127703	0.144966	9.3	12	3.2	242.5	6	0.36	0.46	0.82	76.16	11.31	34	0.0251183	0.123118	10.8356	0.0379346	44.2133	4.10463	5.5253	1.58046	0.0576903	0.0878686	0.00548889	0.00412699	0.00457408
South Branch	HZ	2017-03-18	Winter	0.013	10.2	102	13.1	283.2	6.25	1.056	0.065	1.121	5.999	29.922	0.00548889	0.015614	0.0863791	20.3132	0.00268302	0.311052	6.99239	11.4273	0.0402123	0.0121822	0.151262	11.15	27	1.3	251.8	6.38	0.029	1.905	1.934	41.981	0.25	50.5	0.020215	0.109568	15.6896	0.0205121	22.1834	5.72283	8.37234	1.01994	0.038955	0.124716	0.013	0.00977444	0.0216667
South Branch	HZ	2017-03-22	Winter	0.00883	9.1	104	12.1	286.6	6.5	0.994	0.066	1.06	10.984	20.854	0.00883	0.0192948	0.0825078	17.3621	0.0023107	0.243092	6.69486	9.23822	0.0329617	0.00937234	0.122395	9.7	23	2.7	232.9	6.24	0.025	0.836	0.861	10.828	3.7	14	0.0222292	0.124604	17.7848	0.00264219	18.5596	5.89094	9.31283	1.06609	0.0144319	0.147472	0.00883	0.0066391
South Branch	HZ	2017-03-29	Spring	0.00597	14.6	116	11.8	282.2	6.6	0.399	0.607	1.006	10.516	19.332	0.00597	0.0165529	0.0816068	17.7048	0.00175221	0.199942	8.29915	9.47037	0.0315425	0.00545164	0.12177	15.5	27	2.7	188.1	5.96	0.054	1.3705	1.4245	11.451	2.651	20	0.0644996	0.146519	24.8372	0.00363996	27.3052	20.3953	10.1547	1.20946	0.0295733	0.171073	0.00597	0.00448872
South Branch	HZ	2017-04-05	Spring	0.0074	11.85	110	11.95	284.4	6.55	0.816	0.094	0.91	12.541	19.061	0.0074	0.0213839	0.0813144	16.7034	0.00321701	0.228394	8.12468	8.75928	0.0337126	0.0139465	0.122834	21.2	32	2.9	194.7	6.1	0.045	0.603	0.648	21.576	4.376	23	0.0324638	0.0776673	15.2777	0.00346196	2.62817	6.9599	7.3444	0.289822	0.0308802	0.112097	0.0074	0.00556391
South Branch	HZ	2017-04-12	Spring	0.00921	15.6	121	12	269.3	7.25	0.105	0.05	0.155	13.943	11.042	0.00921	0.0190968	0.0753659	16.0067	0.00245113	0.267764	6.04229	8.46394	0.054932	0.0184086	0.121136	18.3	37	3.5	258.3	6.68	0.04	0.712	0.752	13.0865	12.159	21	0.0403631	0.14261	18.1539	0.00388654	25.5574	6.63488	8.51419	1.0938	0.0218812	0.139622	0.00921	0.00692481
South Branch	HZ	2017-04-19	Spring	0.00745	16.1	107	10.6	242.3	7.12	0.05	0.058	0.108	14.566	16.794	0.00745	0.0102907	0.0792597	17.4657	0.00289368	0.25038	6.21959	9.66918	0.0549831	0.00662785	0.131863	14.3	34	3.6	209	6.4	0.0375	1.029	1.0665	13.476	3.023	38	0.0384077	0.0954097	6.3394	0.00299002	34.4767	3.13881	3.64663	1.1222	0.0136291	0.0731827	0.00745	0.0056015
South Branch	HZ	2017-05-03	Spring	0.0199	14.5	95.1364	10.5	201	6.17333	0.06	0.05	0.11	14.25	13.92	0.0199	0.0146938	0.0773128	16.7362	0.0026724	0.259072	6.13094	9.06656	0.0549575	0.0125182	0.126499	16.3	35.5	3.55	233.65	6.54	0.04	0.87	0.91	13.28	7.59	29.5	0.0393854	0.11901	12.2467	0.00343828	30.017	4.88684	6.08041	1.108	0.0177552	0.106402	0.0199	0.0149624
South Branch	HZ	2017-05-18	Spring	0.00529	18.7	90	8.3	128	7.16	1.304	0.056	1.36	27.292	25.761	0.00529	0.0232939	0.0759041	14.2855	0.00330356	0.395585	5.31619	6.94196	0.0652249	0.0117808	0.107167	20.7	14	1.2	291	6.7	0.046	1.632	1.678	59.849	0.722	16	0.0247545	0.203294	22.6263	0.00311413	59.5078	4.728	9.81024	2.072	0.0179792	0.175344	0.00529	0.00397744	0.000259314
South Branch	HZ	2017-05-25	Spring	0.0371	15.5	87	8.5	188.3	7.27	0.4965	0.074	0.5705	47.378	15.238	0.0371	0.0995715	0.0894269	19.5446	0.00339827	0.460616	7.6558	7.87033	0.100643	0.0154401	0.13664	18	18	1.7	165.9	6.39	0.114	0.31	0.424	22.723	6.948	45	0.046545	0.126285	9.40082	0.00305698	29.4757	4.16236	5.15758	1.1566	0.0111647	0.0702894	0.0371	0.0278947	0.00147222
South Branch	HZ	2017-06-01	Spring	0.00722	17.9	86	8.2	202	7.13	1.144	0.057	1.201	25.198	13.377	0.00722	0.0345182	0.0952255	17.2878	0.00311086	0.439159	8.20162	8.16959	0.0636748	0.0164669	0.12403	20.3	19	1.7	202	6.64	0.126	0.3955	0.5215	32.7185	2.312	28	0.112112	0.191298	21.0605	0.00331499	15.5454	6.68904	9.47599	0.501864	0.0191368	0.148683	0.00722	0.00542857
South Branch	HZ	2017-06-06	Spring	0.00474	18.7	82	7.8	218.2	7.38	0.579	0.344667	0.923667	41.3335	18.689	0.00474	0.0397211	0.0652565	19.1788	0.00471121	0.956193	7.9678	8.84616	0.0945804	0.016635	0.13628	19.6	10	1	239.5	6.73	0.442	0.2875	0.7295	31.386	4.63	36.5	1.99139	0.0184098	0.471598	0.00874308	0.627498	3.36792	0.24802	0.107931	0.0202383	0.0324459	0.00474	0.00356391	0.0237
South Branch	HZ	2017-06-15	Spring	0.00598	22	80	7	216.6	7.3	0.69	0.109	0.799	20.83	17.099	0.00598	0.0167776	0.0975691	18.559	0.00145174	0.688084	6.87166	9.60787	0.123274	0.016523	0.134217	23	0.2	2	216.9	6.76	0.112	1.172	1.284	16.03	3.666	24	0.199386	0.149966	14.8043	0.00429642	48.3455	6.66709	7.36238	1.50027	0.00907362	0.108029	0.00598	0.00449624
South Branch	HZ	2017-06-22	Spring	0.00191	22.2	62	5.4	217.1	6.78	0.354	0.09	0.444	25.103	17.89	0.00191	0.0153304	0.0869399	18.1087	0.0016575	0.43097	8.44112	9.06152	0.0641463	0.00362198	0.129166	22.5	19	1.7	303	6.36	0.059	6.295	6.354	27.292	4.15	40.5	0.0298985	0.161744	35.272	0.00348482	4.36233	8.60263	17.4236	0.686479	0.0433144	0.25471	0.00191	0.00143609
South Branch	HZ	2017-06-29	Summer	0.00191	22.1	71	6.2	216.85	7.04	0.52	0.1	0.62	22.97	17.49	0.00191	0.016054	0.0922545	18.3339	0.00155462	0.559527	7.65639	9.3347	0.0937103	0.0100725	0.131691	22.75	9.6	1.85	259.95	6.56	0.15	3.73	3.88	21.66	3.91	32.25	0.114642	0.155855	25.0381	0.00389062	26.3539	7.63486	12.393	1.09338	0.026194	0.18137	0.00191	0.00143609
South Branch	HZ	2017-07-07	Summer	0.00191	22.2	62	5.4	217.1	6.78	0.312	0.05	0.362	40.53	17.335	0.00191	0.101271	0.145272	20.6297	0.00511755	0.554946	10.2112	9.41135	0.113478	0.0420724	0.13839	22.8	77	6.6	185.5	5.69	0.148	0.02565	0.17365	38.73	21.463	22	0.0825743	0.117692	19.3606	0.00336256	0.458002	10.4641	9.07307	0.154422	0.0237993	0.132563	0.00191	0.00143609	0.00136429
South Branch	HZ	2017-07-14	Summer	0.0188	21.3	63	5.8	186.7	6.66	0.42	0.06	0.48	31.75	17.41	0.0188	0.0586623	0.118763	19.4818	0.00333608	0.557236	8.93377	9.37302	0.103594	0.0260724	0.135041	22.8	43.3	4.225	222.725	6.125	0.15	0.20255	0.35255	30.2	12.69	27.13	0.0986084	0.136773	22.1994	0.00362659	13.406	9.04948	10.733	0.623899	0.0249966	0.156966	0.0188	0.0141353	0.0235
Thompson	SW	2014-06-20	Summer	0.00631519	21.3	68	6.1	80	6.16	0.146444	0.177033	0.323478	18.9129	1.18867		0.0326008	0.0437153	4.3455	0.00257796	0.448575	3.74092	2.68349	0.225285	0.0119218	0.0347105																						0.00631519	0.00257763
Thompson	SW	2014-06-26	Summer	0.00906753	22.6	67	5.8	78.7	6.58	0.147333	0.179667	0.327	16.9597	1.201		0.0389177	0.0421049	4.0778	0.0026275	0.430289	3.80528	2.51693	0.206979	0.0126707	0.0332454																						0.00906753	0.00370103	0.0035699
Thompson	SW	2014-07-01	Summer	0.00931445	22	55	4.8	77.1	5.93	0.05	0.152	0.202	20.241	0.45		0.0267152	0.0463389	4.85269	0.00247236	0.622738	3.50464	3.00939	0.216801	0.0136851	0.0354566																						0.00931445	0.00380182
Thompson	SW	2014-07-10	Summer	0.00931445	21.4	63	5.6	66.7	6.8	0.252	0.207	0.459	19.538	1.915		0.0321696	0.0427021	4.106	0.00263403	0.292698	3.91283	2.52414	0.252074	0.00940968	0.0354296																						0.00931445	0.00380182	0.00104774
Thompson	SW	2014-07-17	Summer	0.0281735	20.4	58	5.1	61.6	7.11	0.15	0.18	0.33	11.1	1.238		0.0578683	0.0372737	3.27471	0.0027761	0.375432	3.99838	2.01727	0.152063	0.0149173	0.02885																						0.0281735	0.0114994
Thompson	SW	2014-07-24	Summer	0.00569742	22.2	60	5.3	73.8	6.35	2.908	0.1665	3.0745	16.725	0.5		0.0284861	0.0464605	4.77653	0.00802293	0.18403	3.29668	2.9382	0.233723	0.0271275	0.0370947																						0.00569742	0.00232548	0.0032044
Thompson	SW	2014-08-01	Summer	0.00396923	20.5	59	5.3	75.3	7.71	1.53	0.17	1.7	13.91	0.62		0.0431772	0.0418671	4.02562	0.00539951	0.279731	3.64753	2.47773	0.192893	0.0210224	0.0329724																						0.00396923	0.00162009
Thompson	SW	2014-08-07	Summer	0.00196762	20.8	49	4.4	76.2	6.61	0.01	0.13	0.14	19.538	0.067		0.0163603	0.04865	5.27265	0.00231396	0.0601826	3.93951	3.31532	0.142666	0.0187633	0.0351659																						0.00196762	0.000803111
Thompson	SW	2014-08-15	Summer	0.00430122	17.8	45	4.4	77.8	6.44	2.809	0.211	3.02	18.6	0.874		0.0422249	0.0552715	5.63	0.00541503	0.152823	4.04413	3.24868	0.334563	0.0125276	0.0398283																						0.00430122	0.0017556
Thompson	SW	2014-09-05	Summer	0.00101885	22.6	45	3.9	83.3	7.05	0.0735	0.087	0.1605	22.82	0.5		0.0226412	0.0441267	5.78193	0.00743832	0.123193	3.15567	3.29377	0.127693	0.016691	0.0425213																						0.00101885	0.000415858
Thompson	SW	2014-09-12	Summer	0.00192128	21.4	35	3.1	77.7	7.21	0.1215	0.171	0.2925	20.944	0.6585		0.0239787	0.0387479	5.9897	0.00444176	0.15353	4.16297	3.46637	0.0790752	0.00166163	0.0423981																						0.00192128	0.000784196	0.000444947
Thompson	SW	2014-09-19	Summer	0.00240964	19.4	32	3	80.2	6.97	0.101	0.206	0.307	20.71	2.8		0.0226947	0.0439943	5.41101	0.00243154	0.0786814	3.87487	3.35433	0.0581659	0.0474218	0.0419477																						0.00240964	0.000983526
Thompson	SW	2014-10-03	Fall	0.0001	17.9	33	3.1	81.7	7.44	0.135	0.128	0.263	19.069	0.692		0.0403658	0.0363829	5.71303	0.00415762	0.164196	3.46809	3.70088	0.111137	0.0122849	0.0339031																						0.0001	4.08163e-05	0.0001
Thompson	SW	2014-10-10	Fall	0.00463415	15.3	37	3.8	85.9	7.28	0.12	0.17	0.29	19.89	1.75		0.0315302	0.0401886	5.56202	0.00329458	0.121439	3.67148	3.52761	0.0846515	0.0298533	0.0379254																						0.00463415	0.00189149
Thompson	SW	2014-10-17	Fall	0.00356179	17.2	45	4.3	87.5	7.43	0.1205	0.05	0.1705	19.772	1.317	35.3	0.037022	0.537978	5.72265	0.00565018	0.439374	4.81298	4.12137	0.209982	0.00927899	0.0404																						0.00356179	0.00145379	0.00254414
Thompson	SW	2014-10-24	Fall	0.00736225	12.8	44	4.7	87.1	7.49	0.1315	0.078	0.2095	11.884	2.826	38.7	0.0234036	0.437326	6.44454	0.00303411	0.779242	3.7787	3.88901	0.316286	0.00569435	0.04235																						0.00736225	0.003005	0.00409014
Thompson	SW	2014-11-07	Fall	0.00647746	11.5	54.1	5.9	89.3	7	0.05	0.151	0.201	15.83	2.097	18.9	0.0325735	0.270824	6.55573	0.00544932	0.960178	4.76001	4.15389	0.168845	0.0126769	0.043813																						0.00647746	0.00264386
Thompson	SW	2014-11-14	Fall	0.00560224	5.8	62	5.8	93.5	8.54	0.07	0.11	0.18	13.86	2.46	17.6	0.0279885	0.354075	6.50014	0.00424172	0.86971	4.26935	4.02145	0.242565	0.00918564	0.0430815																						0.00560224	0.00228663
Thompson	SW	2014-11-21	Fall	0.00467163	3.4	62	8.4	96	8.07	0.0385	0.062	0.1005	14.307	3.2685	23.5	0.0199421	0.730471	6.79169	0.00271731	1.02023	3.26412	4.08434	0.413898	0.0188007	0.0467794																						0.00467163	0.00190679
Thompson	SW	2014-12-12	Fall	0.00524732	5.6	83	10.6	104.8	7.51	0.059	0.136	0.195	16.003	6.366	7.59	0.035623	0.362883	5.94199	0.00309453	1.65809	3.61105	3.73682	0.391584	0.0104365	0.0397224																						0.00524732	0.00214176
Thompson	SW	2014-12-19	Fall	0.0057124	4.7	63	8	99.8	7.43	0.05	0.1	0.15	8.831	4.82	7.77	0.0115453	0.509108	5.74125	0.0026177	1.96449	3.21742	3.59957	0.329294	0.012957	0.0433106																						0.0057124	0.00233159
Thompson	SW	2015-01-02	Winter	0.00434329	2.9	91	12.3	102.5	7.89	0.05	0.547	0.597	10.409	3.893	14.5	0.0141855	0.105684	3.47353	0.00173425	1.95474	2.63949	2.21079	0.22789	0.0121355	0.0363421																						0.00434329	0.00177277
Thompson	SW	2015-01-14	Winter	0.0124441	1.4	94	13.3	131.7	6.92	0.209	0.524	0.733	15.1435	19.777	19.8	0.068686	0.4381	6.32297	0.00357137	1.22564	3.58882	3.76231	0.218889	0.0137598	0.0477843																						0.0124441	0.00507921
Thompson	SW	2015-01-21	Winter	0.00949886	2.6	91	12.5	127.4	7.09	0.236	0.494	0.73	16.158	5.013	16.8	0.0245512	0.14542	5.84034	0.00141581	1.02561	3.50373	3.4858	0.186479	0.0120795	0.0405944																						0.00949886	0.00387709	0.0118736
Thompson	SW	2015-01-28	Winter	0.024545	0.9	102	14.7	204.4	7.24	0.163	0.05	0.213	115.358	6.626	4.43	0.0425914	0.171246	18.0887	0.00254911	1.17435	4.19065	4.89306	0.184873	0.00926032	0.0987987																						0.024545	0.0100184
Thompson	SW	2015-02-04	Winter	0.00926174	1	100	14.2	165.9	6.99	0.097	0.05	0.147	9.69	5.078	8.22	0.0239466	0.485582	5.942	0.00186162	1.61823	3.19001	3.6218	0.35683	0.0166536	0.043505																						0.00926174	0.0037803
Thompson	SW	2015-02-11	Winter	0.00686143	2.5	106	14.4	118.1	7.21	0.141	0.032	0.173	7.306	6.965	8.93	0.0210656	0.712085	5.26801	0.0017767	0.974142	2.77262	3.2782	0.206553	0.0159255	0.045917																						0.00686143	0.00280058
Thompson	SW	2015-02-18	Winter	0.00806159	0.1	95	13.9	116.8	7.28	0.184	0.076	0.26	7.306	4.05	3.46	0.0114678	0.278588	5.60374	0.00105406	1.27353	1.36234	3.69727	0.364522	0.0161524	0.0341305																						0.00806159	0.00329044	0.00366436
Thompson	SW	2015-02-25	Winter	0.014006	0.2	91	13.4	256.5	7.81	0.237	0.078	0.315	7.0675	4.102	4.2	0.0278949	0.370442	9.20844	0.00151706	0.977781	4.13015	5.48526	0.255882	0.0139652	0.0594575																						0.014006	0.00571673
Thompson	SW	2015-03-04	Winter	0.0480597	2.2	137	15.7162	190.5	7.67	0.756	0.1205	0.8765	20.7795	12.503	6.95	0.0539815	0.349965	5.84347	0.00262913	0.779955	3.33788	3.48872	0.16697	0.00664652	0.0401343																						0.0480597	0.0196162	0.00546133
Thompson	SW	2015-03-25	Spring	0.0158729	4.4	104	13.5	101.6	7.67	0.063	0.089	0.152	17.451	14.727	12.3	0.0330764	0.104387	4.4403	0.00201512	0.799244	2.82511	2.68436	0.116868	0.0119488	0.0378089																						0.0158729	0.00647875
Thompson	SW	2015-04-01	Spring	0.0240078	7.4	102	12.4	94.7	7.87	0.09	0.075	0.165	13.32	11.859	4.62	0.0367197	0.122986	3.38288	0.00251645	0.655882	1.96742	1.86107	0.111846	0.00944702	0.0323746																						0.0240078	0.00979909
Thompson	SW	2015-04-08	Spring	0.0178452	11.3	95	10.5	95.8	7.81	0.038	0.1015	0.1395	24.1075	14.154	6.77	0.0877962	0.0613752	4.6905	0.00306514	1.90926	2.79175	2.83939	0.189135	0.0182033	0.0373912																						0.0178452	0.00728376	0.0127466
Thompson	SW	2015-04-15	Spring	0.0999346	10.9	75	8.3	83.8	7.33	0.064	0.1405	0.2045	16.533	13.398	14.9	0.167506	0.0571014	4.06682	0.00596372	0.59581	3.71271	2.24328	0.0884311	0.0224227	0.0313024																						0.0999346	0.0407896	0.249836
Thompson	SW	2015-04-22	Spring	0.0591483	12.9	73	7.6	74.2	7.32	0.1145	0.138	0.2525	15.4135	12.867	10.8	0.0847788	0.056523	3.98438	0.00281203	0.566933	2.90392	2.39477	0.102613	0.00982042	0.0319781																						0.0591483	0.0241422
Thompson	SW	2015-04-29	Spring	0.016883	12.2	92	9.9	85.3	6.73	0.0505	0.182	0.2325	13.897	12.727	5.97	0.0361901	0.074382	4.63257	0.00473162	0.554943	2.87231	2.71949	0.165235	0.00964306	0.0350273																						0.016883	0.00689102
Thompson	SW	2015-05-06	Spring	0.000413382	16.8	89	8.7	86.5	6.58	0.1715	0.149	0.3205	17.094	11.384	12.3	0.0214134	0.0604239	4.84302	0.00424417	0.591144	3.51622	2.86596	0.224338	0.0111647	0.0408601																						0.000413382	0.000168727	0.00103345
Thompson	SW	2015-05-13	Spring	0.00452293	17	86	8.4	94.6	6.99	0.1365	0.3	0.4365	16.9725	8.978	16	0.0204584	0.0646981	5.80146	0.00312066	0.71408	3.75538	3.30704	0.255859	0.0120795	0.046406																						0.00452293	0.00184609
Thompson	SW	2015-05-19	Spring	0.0112284	19.3	90	8.3	89.8	7.56	0.1475	7.291	7.4385	19.0325	8.95	17.1	0.0325574	0.0681626	5.45233	0.00463772	0.916614	3.63442	3.0197	0.284239	0.0154774	0.0423461																						0.0112284	0.004583
Thompson	SW	2015-05-26	Spring	0.00346422	18.7	86	8.1	90.4	7.46	0.1065	0.2344	0.3409	18.665	9.481	18.6	0.0220928	0.0730474	6.39775	0.00355994	0.371416	2.75709	3.06402	0.365404	0.0241216	0.0447293																						0.00346422	0.00141397
Thompson	SW	2015-06-16	Spring	0.00061542	22.5	69	5.4	91	7.51	0.0695	0.236	0.3055	13.99	17.903	68.4	0.0552361	0.140322	5.90042	0.006047	1.26413	5.01535	3.35743	0.336966	0.0178859	0.0384422																						0.00061542	0.000251192
Thompson	SW	2015-06-24	Summer	0.00298767	21.9	86	7.6	63.64	7.21	0.05	0.152	0.202	20.925	18.014	23.8	0.0172297	0.000497523	0.0110641	0.00255728	0.00861322	2.80079	0.00931532	0.00126013	0.00660918	0.00715715																						0.00298767	0.00121946
Thompson	SW	2015-06-30	Summer	0.00321566	19.6	89	8.2	64.1	7.86	0.0775	0.057	0.1345	17.46	19.106	16	0.214265	0.0445431	3.8823	0.00530562	1.29085	5.04532	1.98789	0.161568	0.0127516	0.0279568																						0.00321566	0.00131251
Thompson	SW	2015-07-09	Summer	0.00551229	22.2	89	7.8	75.1	7.07	0.05	0.05	0.1	19.19	19.917	33.2	0.100601	0.0383883	4.18622	0.00433725	0.707117	4.58387	2.17954	0.142432	0.0159255	0.0327481																						0.00551229	0.00224992
Thompson	SW	2016-05-18	Summer	0.0145	13.8	78.25	7.475	99.1	7.51	0.1335	0.57	0.7035	21.2215	16.504	51.8	0.0830775	0.0468848	4.74059	0.00424907	1.76405	4.54142	2.46476	0.23548	0.017083	0.0279683																						0.0145	0.00591837	0.0725
Thompson	SW	2016-05-23	Summer	0.112	13.9	78.5	7.35	83.3	7.91	0.136	0.491	0.627	25.034	23.358	18.9	0.215164	0.0408865	4.22525	0.00602577	0.794982	4.97432	2.1916	0.0865432	0.00957771	0.0311138																						0.112	0.0457143	0.28
Thompson	SW	2016-06-02	Summer	0.00865	18.5	78	7.6	98.9	7.69	0.1115	0.6165	0.728	32.387	20.476	22.2	0.0358584	0.0443902	6.17411	0.00236295	1.29305	4.83824	2.88038	0.192305	0.0202196	0.0391025																						0.00865	0.00353061	0.04325
Thompson	SW	2016-06-06	Summer	0.00938	20.2	79	7.1	100.8	7.56	0.203	0.583	0.786	242.266	20.896	9.06	0.0467189	0.0514132	5.08853	0.00502637	1.19961	3.46666	2.45003	0.224689	0.0103245	0.0390506																						0.00938	0.00382857	0.0469
Thompson	SW	2016-06-13	Summer	0.00216	19	65	5.9	103	6.91	0.16	0.6	0.76	137.33	14.2235	43.5	0.0167509	0.0426497	5.5111	0.00627399	1.1328	4.74889	2.41423	0.224815	0.0205743	0.0378224																						0.00216	0.000881633
Thompson	SW	2016-06-27	Summer	0.00242	21.3	63	5.6	109.6	7.95	0.239	0.59	0.829	22.88	16.839	33.7	0.0278601	0.626731	5.31443	0.0087986	2.44856	2.97887	2.66553	0.210715	0.00759869	0.0409178																						0.00242	0.000987755	0.000128723
Thompson	SW	2016-07-05	Summer	0.0108	20.15	64	5.75	106.3	7.43	0.2	0.415	0.615	80.11	14.154	19.5	0.0637907	0.0397667	4.84401	0.00424907	0.799359	3.81588	2.6662	0.202198	0.0199956	0.0377069																						0.0108	0.00440816	0.0036
Thompson	SW	2016-07-28	Summer	0.000114	25.2	44	3.6	113.4	7.36	0.22	0.46	0.68	51.5	18.77	89.7	0.0159965	0.0324213	7.80657	0.0014501	0.144084	5.66835	4.13293	0.213001	0.0170084	0.0556537																						0.000114	4.65306e-05	5.64356e-06
Thompson	SW	2016-08-01	Summer	0.00107	24.2	58	4.7	126	7.25	0.143	0.235	0.378	35.992	13.202	41.3	0.0667011	0.0474863	4.51044	0.00142398	0.895236	4.96465	2.41399	0.287699	0.0172137	0.0301186																						0.00107	0.000436735	0.00535
Thompson	SW	2016-09-07	Summer	0.000592	21.1	33	3	118.1	6.31	0.075	0.234	0.309	27.517	12.363	11.3	0.041508	0.629881	8.91926	0.00252788	1.1683	3.51219	5.49293	1.02834	0.0175498	0.0595345																						0.000592	0.000241633	3.1828e-05
Thompson	SW	2016-09-14	Summer	0.00107	21.1	39	3.6	98.7	7.37	0.071	0.254	0.325	22.432	13.692	64.5	0.0157477	0.0372222	4.24185	0.0032856	1.44886	2.00322	2.03993	0.494899	0.00817746	0.0338338																						0.00107	0.000436735
Thompson	SW	2016-09-21	Summer	0.0001	21.1	56	5.1	93.4	7.46	0.1485	0.225	0.3735	25.822	14.881	24.1	0.0177112	0.050043	6.68699	0.0180104	1.0025	3.78677	4.17968	0.168198	0.0523133	0.0448525																						0.0001	4.08163e-05	0.000166667
Thompson	HZ	2016-09-28	Fall	0.0204115	18.3	68	6.4	81.8	7.81	0.226	0.233	0.459	30.342	0.5	74.4	0.0309123	0.0437979	5.12051	0.0021278	0.921531	4.14046	2.77572	0.173153	0.0137598	0.0419977	20.1	13	1.1	336.7	6.55	0.052	2.026	2.078	18.853	0.25	11	0.0189765	0.178278	17.5691	0.00426866	62.8752	4.40038	7.35039	2.83325	0.0200889	0.106551	0.0204115	0.00833123	0.0510288
Thompson	HZ	2016-10-05	Fall	0.0034	16.7	67	6.8	98	6.47	0.166	0.348	0.514	25.0685	0.887	48.3	0.0266216	0.0677797	7.12532	0.00349789	1.08903	4.36593	4.16162	0.233736	0.0230014	0.0488603	18.7	35	3.4	380.8	6.21	0.028	1.014	1.042	23.938	4.993	25.5	0.0183131	0.233455	23.0461	0.00358443	120.676	2.8082	9.85588	3.07623	0.015048	0.142177	0.0034	0.00138776	0.017
Thompson	HZ	2016-10-19	Fall	0.00245	19.3	63	5.9	98.8	6.34	0.153857	0.06	0.213857	27.131	6.742	26	0.0164111	0.0749264	7.42256	0.00181426	0.705944	4.55833	4.26323	0.220008	0.0193048	0.0477727	19.4	24	2.25	358.75	6.38	0.145571	4.7615	4.90707	21.012	2.886	41	0.0125163	0.0773674	22.1836	0.0013015	20.9911	6.01548	9.38842	2.81663	0.0193421	0.135497	0.00245	0.001	0.01225
Thompson	HZ	2016-11-02	Fall	0.00715247	12.6	48.1	5	100.1	6.72	0.16	0.2	0.36	26.1	3.81	32	0.0215164	0.0713531	7.27394	0.00265607	0.897484	4.46213	4.21242	0.226872	0.0211531	0.0483165	14.1	13	1.3	610.6	6.35	0.05	2.4955	2.5455	10.5	3.94	38.5	0.0154147	0.155411	22.6148	0.00244297	70.8333	4.41184	9.62215	2.94643	0.0171951	0.138837	0.00715247	0.00291938
Thompson	HZ	2016-11-09	Fall	0.0001	8.8	71	8.3	96.2	7.08	0.085	0.062	0.147	24.425	4.35	75.1	0.0181124	0.0692108	7.362	0.00253932	1.3572	6.58557	4.11361	0.18324	0.00659051	0.0445079	12.3	24	2.6	763	6.67	0.042	0.062	0.104	20.677	2.886	38.5	0.022692	0.355067	50.3903	0.00320231	147.561	6.7857	24.7729	6.77884	0.0188194	0.300371	0.0001	4.08163e-05	2.38095e-05
Thompson	HZ	2016-11-16	Fall	0.0059212	10.8	58	6.4	101.1	6.27	0.05	0.055	0.105	22.323	0.5	53.55	0.0122569	0.0626417	7.1454	0.00235805	1.76145	4.36138	4.35479	0.203707	0.0139278	0.0470162	12.3	16	1.5	410.7	6.23	0.05	13.8345	13.8845	24.946	3.35	34.5	0.024618	0.33868	70.8514	0.00220292	131.804	5.68048	38.6845	8.31105	0.0146933	0.41749	0.0059212	0.00241682
Thompson	HZ	2016-11-30	Fall	0.0029606	9.8	64.5	7.35	98.65	6.675	0.023	0.061	0.084	26.3293	10.17	75.1	0.0180054	0.062062	7.03359	0.00237112	2.45208	5.3065	4.31915	0.375759	0.0143946	0.0439304	9.2	55	6.1	679	6.11	0.05	3.063	3.113	26.0383	8.849	34	0.0419841	0.332345	26.6951	0.00366608	128.548	4.9132	16.2826	3.65168	0.0149173	0.217486	0.0029606	0.00120841	0.00211472
Thompson	HZ	2016-12-07	Fall	0.0059212	10.8	58	6.4	101.1	6.27	0.717	0.056	0.773	30.845	12.991	64.325	0.0758416	0.0899234	5.51546	0.00273854	1.28267	5.73279	3.087	0.300007	0.0163923	0.0436455	10	20	2.3	311.3	5.41	0.025	16.4725	16.4975	23.634	3.422	37.5	0.019038	0.348014	51.5569	0.00201512	114.783	4.9671	25.9227	6.55022	0.0124716	0.335023	0.0059212	0.00241682	0.00986867
Thompson	HZ	2016-12-14	Fall	0.00864532	7.4	102	12.3	116	5.07	0.37	0.06	0.43	28.59	11.58	10.6	0.0469235	0.0759927	6.27452	0.00255483	1.86738	5.51965	3.70308	0.337883	0.0153934	0.043788	9.6	37.5	4.2	495.15	5.76	0.025	9.77	9.795	24.84	6.14	35.75	0.030511	0.340179	39.126	0.0028406	121.666	4.94015	21.1026	5.10095	0.0136944	0.276255	0.00864532	0.0035287
Thompson	HZ	2017-01-18	Winter	0.00864532	7.4	102	12.3	116	5.07	0.086	0.092	0.178	20.794	3.023	10.6	0.0140785	0.0777819	6.71734	0.002959	1.53505	4.46931	4.04532	0.320589	0.00761736	0.04276	12	21	2.2	403.5	6.15	0.025	2.036	2.061	27.131	2.211	33.5	0.0163229	0.195258	18.31	0.00360077	84.3802	4.16079	9.408	2.55481	0.0128636	0.124214	0.00864532	0.0035287	0.0432266
Thompson	HZ	2017-01-25	Winter	0.00864532	7.4	102	12.3	116	5.07	0.114	0.154	0.268	47.236	5.797	10.6	0.0616802	0.0761829	5.60474	0.00327906	1.08401	4.30914	3.19072	0.158045	0.0080281	0.0455609	7.8	12	1.4	401.5	6.45	0.05	3.104	3.154	59.123	7.049	38.5	0.0215846	0.185822	28.821	0.00344726	66.128	4.18616	14.4523	3.10109	0.0160375	0.17089	0.00864532	0.0035287
Thompson	HZ	2017-02-01	Winter	0.00795822	4.3	91	11.9	113.7	6.98	0.05	0.169	0.219	59.123	13.038	4.42	0.0168204	0.0804382	5.86242	0.00562079	1.86253	3.77616	3.52051	0.277533	0.00767337	0.0388099	12.1	16	1.7	349.4	6.15	0.05	5.021	5.071	72.199	1.433	35.5	0.0147526	0.241086	26.8814	0.0043944	110.499	4.84577	14.0549	3.72393	0.0178112	0.176501	0.00795822	0.00324825
Thompson	HZ	2017-02-08	Winter	0.0110128	9.7	95	10.7	111.7	6.23	0.05	0.169	0.219	61.897	10.839	9.56	0.0128106	0.0738428	6.11956	0.00349625	1.07817	3.89628	3.65373	0.292714	0.0136478	0.0472934	5.6	16	2.2	312.2	6.03	0.05	3.165	3.215	80.718	0.25	34.5	0.0126795	0.188324	18.8308	0.00382285	89.237	3.9815	10.049	2.60985	0.0155334	0.145642	0.0110128	0.00449503
Thompson	HZ	2017-02-17	Winter	0.00654367	6	113.596	12.8	107.3	5.93	0.05	0.188	0.238	64.472	4.444	9.52	0.0237888	0.0864118	6.32601	0.00251482	1.49613	3.8392	3.70511	0.359273	0.0140585	0.0410295	12.1	16	1.7	655.4	6.25	0.05	4.89	4.94	74.18	2.685	36.5	0.0164646	0.228312	14.1202	0.00316149	101.607	3.85398	6.25878	2.49967	0.0111833	0.0987968	0.00654367	0.00267088
Thompson	HZ	2017-02-22	Winter	0.00865292	8.7	89	10.4	109.4	6	0.05	0.156	0.206	65.067	3.869	15.3	0.0120509	0.077847	6.48488	0.00237275	2.40087	3.8326	3.78248	0.370842	0.0122102	0.04307	8.85	16	1.95	483.8	6.14	0.05	6.511	6.561	68.039	0.25	35.5	0.0188935	0.177208	28.1388	0.00278916	79.7765	4.32196	14.8526	3.96547	0.0135171	0.148714	0.00865292	0.0035318
Thompson	HZ	2017-03-17	Winter	0.0168	7.1	49.5	11.3	111.4	5.8	0.05	0.17	0.22	64.77	4.16	20.6	0.0266965	0.0904975	7.32122	0.00170812	1.33292	4.22763	4.48078	0.225742	0.00890559	0.0469546	11	16	1.7	526.7	6	0.05	5.7	5.75	71.11	1.34	36	0.0280822	0.204678	14.6512	0.00237765	80.6988	3.93087	7.1202	1.93886	0.0098951	0.106857	0.0168	0.00685714	0.014
Thompson	HZ	2017-03-18	Winter	0.0178	7.35	93	11.6	108.35	6	0.145	0.164	0.309	3.662	5.425	11.2	0.0193737	0.0841723	6.90305	0.00204043	1.8669	4.03012	4.13163	0.298292	0.0105579	0.0450123	12.1	16	1.825	569.6	6.195	0.047	2.867	2.914	18.772	0.25	38.5	0.0234878	0.190943	21.395	0.00258341	80.2376	4.12642	10.9864	2.95217	0.0117061	0.127785	0.0178	0.00726531	0.0296667
Thompson	HZ	2017-03-22	Winter	0.00926	13.3	91	9.6	109	5.87	0.1	0.243	0.343	5.22	0.485	7.53	0.0459191	0.0826486	5.34994	0.00368078	1.16164	3.90484	2.9804	0.177689	0.00735598	0.0374393	7.8	12	1.5	292.7	6.61	0.044	3.707	3.751	26.56	0.25	24	0.0159109	0.195706	16.1474	0.00287735	80.1471	4.22773	8.36763	2.23343	0.0122288	0.114894	0.00926	0.00377959
Thompson	HZ	2017-03-29	Spring	0.01303	10.2	92	10.45	110.2	5.835	0.05	0.131	0.181	8.803	1.872	14.065	0.0271245	0.0752647	5.55342	0.00276957	0.662637	5.40451	3.05186	0.204544	0.0141892	0.0392738	14.6	1	0.1	184.9	6.6	0.05	3.589	3.639	26.249	0.25	23	0.0145467	0.157746	16.3312	0.00193184	58.9873	5.64501	7.82229	2.11077	0.0158882	0.100027	0.01303	0.00531837
Thompson	HZ	2017-04-05	Spring	0.0142	13.5	97	10.1	102	6.36	0.05	0.204	0.254	10.36	7.083	13.6	0.0202043	0.0681701	5.18366	0.00354198	0.714704	5.40736	2.88281	0.204477	0.0174191	0.0322822	15.8	13	1.3	315.6	6.79	0.025	3.881	3.906	24.38	0.25	22	0.0170451	0.170445	17.5939	0.00252952	60.3722	5.68935	8.67806	2.28018	0.0209851	0.109785	0.0142	0.00579592
Thompson	HZ	2017-04-12	Spring	0.0658	15.1	90	9.1	96.2	6.39	0.05	0.16	0.21	24.224	0.5	9.8	0.0338789	0.0775962	5.5026	0.00282346	0.790992	3.70231	3.11264	0.214815	0.0123222	0.0404539	17.3	11	1	394.3	6.76	0.025	5.683	5.708	28.741	0.25	21	0.013145	0.186727	20.5693	0.00314842	72.6572	4.10753	9.99984	2.812	0.0176992	0.130236	0.0658	0.0268571
Thompson	HZ	2017-04-19	Spring	0.00508	13.9	86	9	99	6.4	0.063	0.148	0.211	13.2425	1.534	15.2	0.0216541	0.0712999	4.43745	0.00300309	1.03022	2.78302	2.28284	0.19905	0.0162616	0.031287	14.6	21	2.1	284	6.58	0.025	3.705	3.73	15.968	0.25	20	0.0176443	0.183152	17.1629	0.00199389	61.1138	3.84625	9.05873	2.19896	0.0123595	0.126372	0.00508	0.00207347
Thompson	HZ	2017-05-03	Spring	0.0127	18.8	80	7.5	76.3	6.44	0.05	0.05	0.1	18.73	0.77	41.3	0.0277665	0.0744481	4.97002	0.00291327	0.910606	3.24266	2.69774	0.206933	0.0142919	0.0358704	15.95	16	1.55	339.15	6.67	0.025	4.69	4.715	22.35	0.25	20.5	0.0153946	0.18494	18.8661	0.00257116	66.8855	3.97689	9.52928	2.50548	0.0150294	0.128304	0.0127	0.00518367
Thompson	HZ	2017-05-18	Spring	0.0911	16.35	83	8.25	87.65	6.42	0.069	0.201	0.27	21.105	4.985	49.8	0.0967681	0.0719584	5.62861	0.00347013	1.11148	3.95026	3.12875	0.251425	0.0129383	0.0411661	22.5	13	1.1	359.7	6.73	0.05	3.269	3.319	71.177	0.25	28	0.0140491	0.166325	17.7482	0.00388654	107.139	5.42692	8.5292	3.0275	0.0185953	0.119491	0.0911	0.0371837	0.00446569
Thompson	HZ	2017-05-25	Spring	0.0263	17.8	80	7.7	77.3	6.57	0.123	0.048	0.171	28.53	1.534	14.3	0.195938	0.1188	5.2139	0.00661528	1.1139	3.54468	2.49541	0.0879379	0.0160749	0.0416108	22.5	14.5	1.25	349.425	6.7	0.174	0.184	0.358	22.533	5.391	49	0.1169	0.171335	9.41344	0.0103124	10.3004	2.9662	4.03546	0.278542	0.0163176	0.0550261	0.0263	0.0107347	0.00104365
Thompson	HZ	2017-06-01	Spring	0.00807	18.2	83	7.8	85.6	6.89	0.178	0.042	0.22	24.341	0.5	10.5	0.0990098	0.0253089	0.907387	0.00368405	0.558299	2.44302	0.208	0.0251339	0.0128636	0.0166147	20.5	11	1	233.4	6.43	0.11	1.352	1.462	25.579	0.25	30	0.0527136	0.222774	13.5525	0.00483858	85.2488	5.08451	6.00778	1.80091	0.0235989	0.0935011	0.00807	0.00329388
Thompson	HZ	2017-06-06	Spring	0.00162	22.3	74	6.4	81	6.73	0.24	0.3335	0.5735	26.436	2.617	12.4	0.141114	0.064365	5.07898	0.00342277	4.76211	5.26425	2.92583	0.386756	0.0134984	0.031928	20.5	12.75	1.125	291.41	6.565	0.05	0.77	0.82	24.06	2.7	39.5	0.0848069	0.197055	11.483	0.00757549	47.7746	4.02535	5.02162	1.03973	0.0199582	0.0742636	0.00162	0.000661224	0.0081
Thompson	HZ	2017-06-15	Spring	0.001	23.7	68	5.8	79.3	6.71	0.172	0.248	0.42	12.43	2.278	10.5	0.0224861	0.0766924	5.50678	0.00285612	1.76997	3.70491	3.16912	0.340659	0.00948436	0.0301359	27	6	0.5	670	6.94	0.142	2.90952	3.05152	20.11	0.113	24	0.0234437	0.460694	55.2733	0.00361709	203.997	6.83072	23.9153	8.16337	0.0188567	0.345289	0.001	0.000408163
Thompson	HZ	2017-06-22	Spring	0.00131	23	71	6.1	80.15	6.72	0.204	0.219	0.423	49.949	2.45	11.45	0.0352137	0.0769369	5.55307	0.00224701	1.9142	5.8734	2.96407	0.508113	0.0106606	0.0397358	24.9	6	0.5	245.5	6.52	0.067	2.101	2.168	38.383	1.41	31.75	0.0457024	0.245611	10.7893	0.00589513	103.9	5.30185	5.0669	1.71427	0.0143386	0.0703029	0.00131	0.000534694
Thompson	HZ	2017-06-29	Summer	0.001	23.7	68	5.8	79.3	6.71	0.19	0.23	0.42	31.19	2.36	10.5	0.0288499	0.0768147	5.52993	0.00255156	1.84209	4.78916	3.06659	0.424386	0.0100725	0.0349359	25.95	6	0.5	457.75	6.73	0.04	2.51	2.55	29.25	0.76	27.88	0.034573	0.353153	33.0313	0.00475611	153.949	6.06628	14.4911	4.93882	0.0165976	0.207796	0.001	0.000408163
Thompson	HZ	2017-07-07	Summer	0.0337	21	75	6.6	60	6.84	0.374	0.05	0.424	19.27	0.857	62.7	0.20856	0.099514	4.68641	0.00637112	1.45425	4.92307	2.18479	0.215378	0.0210204	0.0315628	22	26	2.76	234.88	5.91	0.077	1.2894	1.3664	16.51	0.25	22	0.024092	0.329846	18.7108	0.00392314	149.995	2.87771	9.89713	3.10797	0.0160943	0.141426	0.0337	0.0137551	0.0240714
Thompson	HZ	2017-07-14	Summer	0.0337	21	75	6.6	60	6.84	0.086	0.13	0.216	25.23	0.5	62.7	0.0239537	0.0690423	4.48537	0.00178482	0.508475	2.07135	2.63934	0.264987	0.0267584	0.0247916	24.5	6	0.4	337.1	6.61	0.065	1.9	1.965	22.88	0.25	21	0.0456826	0.359582	16.1734	0.00480768	144.799	3.98551	7.60886	2.5809	0.0161258	0.121546	0.0337	0.0137551	0.042125
[truncated: 4 more columns]
